1 **Vitamin D receptor protects against dysbiosis and tumorigenesis via the JAK/STAT**  
2 **pathway in intestine**

3

4 Yong-Guo Zhang<sup>1\*</sup>, Rong Lu<sup>1\*</sup>, Shaoping Wu<sup>2</sup>, Ishita Chatterjee<sup>1</sup>, David Zhou<sup>3</sup>, Yinglin Xia<sup>1</sup>, Jun  
5 Sun<sup>1,4</sup>

6

7 1. Division of Gastroenterology and Hepatology, Department of Medicine, University of  
8 Illinois at Chicago, IL 60612, USA

9 2. Department of Biochemistry, Rush University, 1735 W. Harrison St., Chicago, IL 60612,  
10 USA

11 3. Department of Pathology and Immunology, Washington University in St. Louis, St. Louis,  
12 Missouri, USA

13 4. UIC Cancer Center, University of Illinois at Chicago, IL 60612, USA

14

15 \* Equal contribution

16

17 **Corresponding author:**

18

19 Jun Sun, PhD, AGAF, FAPS

20 Professor

21 Division of Gastroenterology and Hepatology

22 Department of Medicine, Department of Microbiology/Immunology

23 University of Illinois at Chicago

24 840 S Wood Street, Room 704 CSB, MC716 Chicago, IL, 60612

25 Tel: 312-996-5020 E-mail: [junsun7@uic.edu](mailto:junsun7@uic.edu)

26 **Abstract**

27 **Background:** Vitamin D exerts regulatory roles via vitamin D receptor (VDR) in mucosal  
28 immunity, host defense, and inflammation involving host factors and microbiome. Human *Vdr*  
29 gene variation shapes the microbiome and VDR deletion leads to dysbiosis. Low VDR expression  
30 and diminished vitamin D/VDR signaling are observed in colon cancer. Nevertheless, how  
31 intestinal epithelial VDR is involved in tumorigenesis through gut microbiota remains unknown.  
32 We hypothesized that intestinal VDR protects mice against dysbiosis via modulating the  
33 JAK/STAT pathway in tumorigenesis. To test our hypothesis, we used an azoxymethane/Dextran  
34 Sulfate Sodium-induced cancer model in intestinal VDR conditional knockout ( $VDR^{\Delta IEC}$ ) mice, cell  
35 cultures, stem-cell derived colonoids, and human colon cancer samples.

36 **Results:**  $VDR^{\Delta IEC}$  mice have higher numbers of tumors with location shifted from distal to proximal  
37 colon. Fecal microbiota analysis showed that VDR deletion leads to bacterial profile shift from  
38 normal to susceptible carcinogenesis. We found enhanced bacterial staining in mouse and human  
39 tumors. Microbial metabolites from  $VDR^{\Delta IEC}$  mice showed elevated secondary bile acids,  
40 consistent with the observations in human CRC. We further identified that VDR protein bound to  
41 the Jak2 promoter, suggesting that VDR transcriptionally regulated Jak2. The JAK/STAT pathway  
42 is critical in intestinal and microbial homeostasis. Fecal samples from  $VDR^{\Delta IEC}$  mice activate the  
43 STAT3 activation in human and mouse organoids. Lack of VDR led to hyperfunction of Jak2 in  
44 respond to intestinal dysbiosis. A JAK/STAT inhibitor abolished the microbiome-induced  
45 activation of STAT3.

46 **Conclusion:** We provide insights into the mechanism of VDR dysfunction leading to dysbiosis  
47 and tumorigenesis. It indicates a new target — microbiome and VDR for prevention of cancer.

48

49 **Key Words** Cancer; colonoids; dysbiosis; host-bacterial interactions; inflammation, microbiome,  
50 nuclear receptor, VDR, vitamin D.

51

## 52 **Background**

53 Current research has implicated vitamin D deficiency as a critical factor in the pathology and  
54 clinical outcome of colon rectal cancer (CRC) [1, 2]. Low plasma vitamin D is associated with  
55 adverse CRC survival after surgical resection [3, 4]. Vitamin D receptor (VDR) is a nuclear  
56 receptor that mediates functions of 1,25-dihydroxyvitamin D ( $1,25(\text{OH})_2\text{D}_3$ ), the biological active  
57 form of vitamin D [5]. Higher VDR expression in tumor stromal fibroblast is associated with longer  
58 survival in a large cohort of CRC patients [2]. The parallel appreciation of a role for the VDR in  
59 cancer biology began approximately 3 decades ago and subsequently a remarkable increase has  
60 occurred in the understanding of its actions in normal and malignant systems [6].

61  
62 The VDR regulation of gut microbiome in human and animal studies represents a newly identified  
63 and highly significant activity for VDR [7-9]. Human *Vdr* gene variation shapes gut microbiome  
64 and *Vdr* deletion leads to dysbiosis [8]. Our study on VDR and bacteria establishes a  
65 microorganism-induced program of epithelial cell homeostasis and repair in the intestine [10].  
66 Dysregulation of bacterial-host interaction can result in chronic inflammatory and over-exuberant  
67 repair responses, and is associated with the development of various human diseases including  
68 cancers [11, 12]. Even though vitamin D/VDR is an active topic in cancer research, the  
69 mechanism underlying host-microbiome interactions in cancer is incompletely understood. We  
70 know little about the mechanisms for the intestinal epithelial VDR and microbiome in CRC.

71  
72 In the current study, we focused on the functions of VDR in intestinal epithelial cells and the  
73 microbiome. We hypothesized that intestinal VDR protects mice against dysbiosis via modulating  
74 the JAK/STAT pathway in tumorigenesis. VDR is required for intestinal epithelium functions and  
75 microbial homeostasis. We tested our hypothesis in an azoxymethane/Dextran Sulfate Sodium  
76 (AOM/DSS)-induced cancer model, using intestinal VDR conditional knockout  $\text{VDR}^{\Delta\text{IEC}}$  mice,  
77 colonoids, and human samples. Lack of the VDR signaling pathway led to increased tumors in

78 colon and shift tumor distribution in the intestinal VDR knockout (KO) mice. We investigated how  
79 the absence of intestinal VDR leads to dysfunction in epithelial cells-microbiome interactions and  
80 the mechanism through the JAK/STAT3 signaling. Emerging data suggest that interference  
81 JAK/STAT3 pathway may suppress the growth of colon cancer [13, 14]. JAK/STAT inhibitors are  
82 clinically used in patients with inflammatory bowel diseases [15]. Thus, VDR regulation of  
83 JAK/STAT3 pathway indicates a new target—microbiome and VDR signaling in anti-inflammation  
84 and anti-cancer. Our study provides new insights into the mechanisms of VDR in maintaining  
85 intestinal and microbial homeostasis and protecting against intestinal tumorigenesis.

86

## 87 **Results**

### 88 **Intestinal epithelial VDR KO mice have higher tumor numbers and shifted tumor location**

89 We tested our hypothesis in an AOM/DSS-induced cancer model using intestinal epithelial VDR  
90 conditional knockout  $VDR^{\Delta IEC}$  mice (Fig. 1a). AOM mice develop hyperproliferative colonic  
91 mucosa, aberrant crypt foci (ACF), and eventually carcinomas [16]. AOM-DSS provides a widely  
92 used paradigm to study colitis-associated colon cancer. There was a striking difference in tumor  
93 incidence in mice with  $VDR^{LoxP}$  and  $VDR^{\Delta IEC}$  mice. We found the  $VDR^{\Delta IEC}$  mice developed more  
94 tumors (Fig. 1b and c). The number and size of tumors were significantly bigger in the  $VDR^{\Delta IEC}$   
95 mice compared with the  $VDR^{LoxP}$  mice (Fig. 1c and d). Interestingly, tumor location in the  $VDR^{\Delta IEC}$   
96 mice significantly shifted from distal to proximal colon, compared to tumors mainly in the distal  
97 colon of  $VDR^{LoxP}$  mice (Fig. 1b and e). Furthermore, the pathological analysis of colon samples  
98 (Fig. 1f) indicated difference of tumor stage (carcinoma versus adenoma) between  $VDR^{\Delta IEC}$  mice  
99 and  $VDR^{LoxP}$  AOM/DSS experimental groups. Epithelial hyperproliferation plays a critical role in  
100 the development of colon cancer. Our IHC data of proliferative marker PCNA showed that PCNA  
101 in colon was significantly increased in the  $VDR^{\Delta IEC}$  mice, compared to the  $VDR^{LoxP}$  mice (Fig. 1g).

102

103 **Lack of intestinal VDR leads to dysbiosis and shift of bacterial profile for the higher risk of**  
104 **CRC**

105 VDR<sup>ΔIEC</sup> mice lacking intestinal epithelial VDR is known to have dysbiosis [7]. Using 16S  
106 sequencing methods, we showed the difference of fecal microbiome between VDR<sup>ΔIEC</sup> mice and  
107 VDR<sup>LoxP</sup> mice (n=10 each) at the genus level (n=10) (Fig. 2a). Fig. 2b showed the Unweighted  
108 UniFrac distances of stool samples from VDR<sup>LoxP</sup> and VDR<sup>ΔIEC</sup> mice on a principal coordinate  
109 analysis (PCoA) scale. We further showed the percentages of the affected genera between  
110 VDR<sup>LoxP</sup> mice and VDR<sup>ΔIEC</sup> mice (Fig. 2c). Functional alterations of the intestinal microbiome were  
111 detected by fecal microbiota KEGG analysis. Lacking VDR leads to bacterial profile shift from  
112 normal to carcinogenesis susceptibility (Fig. 2d), indicating that cancer risk was significantly  
113 higher in the VDR<sup>ΔIEC</sup> mice.

114

115 **VDR deletion enhanced bacteria in the tumors of VDR<sup>ΔIEC</sup> mice and impacted bile acid**  
116 **metabolism**

117 We then analyzed the relative bacteria abundance in the tumors. *Bacteroides fragilis*, a bacterial  
118 species enhanced in colon cancer, showed more staining in the tumors of VDR<sup>ΔIEC</sup> mice,  
119 compared to the VDR<sup>LoxP</sup> mice (Fig. 3a). Fig. 3b further showed that *Bacteroidales fragilis*,  
120 *Butyivibrio fibrisolvens* and *Firmicutes peptostreptococcus* were enhanced in tumors in VDR<sup>ΔIEC</sup>  
121 mice compared to VDR<sup>LoxP</sup> mice in tumor tissue. These bacteria are known to be associated with  
122 changes of metabolite (e.g. short chain fatty acids, bile acids) in CRC [17-19].

123

124 We quantitatively profiled metabolites derived from host-microbial co-metabolism in fecal samples  
125 using the unbiased method. We found the changes in primary bile acid metabolism and secondary  
126 bile acid metabolism in VDR<sup>ΔIEC</sup> mice. The fold change ratios of the identified bile acid species  
127 were significantly higher in the VDR<sup>ΔIEC</sup> group than those in the control group (Fig. 3c and d).

128 These changes are consistent with the recent observations in human CRC that the bile acid  
129 metabolism is among the top biomarkers of patients [20].

130

### 131 **Increased inflammation in the VDR<sup>ΔIEC</sup> mice**

132 We further hypothesized that the altered intestinal epithelial and microbial functions lead to  
133 chronic inflammation, thus exacerbating colon cancer progression. We assessed several  
134 lymphocyte markers in normal colon and colonic tumors. Levels of CD68, CD3, and CD11b  
135 significantly increased in tumors, especially in VDR<sup>ΔIEC</sup> mice (Fig. 4a). We also detected the  
136 cytokines in serum samples from VDR<sup>LoxP</sup> and VDR<sup>ΔIEC</sup> mice with or without tumor. We found that  
137 the level of FGF basic and MCP-1 in the tumor tissue of VDR<sup>LoxP</sup> mice were higher than that of  
138 VDR<sup>ΔIEC</sup> mice (Fig. 4b). In the gastrointestinal tract, tissue barrier integrity is particularly important.  
139 Serum samples from VDR<sup>LoxP</sup> and VDR<sup>ΔIEC</sup> mice were used to measure bacterial endotoxin with  
140 Limulus ameobocyte lysate chromogenic endpoint assays. We found more bacterial endotoxin LPS  
141 in VDR<sup>ΔIEC</sup> mice than in VDR<sup>LoxP</sup> mice, especially in tumor groups (Fig. 4c). Lcn-2 is used as a  
142 marker of intestinal inflammation [21]. We found that the expression level of fecal Lcn-2 was  
143 significantly higher in tumor tissue of VDR<sup>ΔIEC</sup> mice than that of the VDR<sup>LoxP</sup> mice (Fig. 4d).

144

### 145 **VDR deletion leads to hyperfunction of the Jak2 / STAT3 signaling in the tumor tissue**

146 The JAK/STAT3 pathway is known to suppress the growth of colon cancer [13]. After the  
147 AOM/DSS treatment, in VDR<sup>ΔIEC</sup> mice, we observed upregulated Jak2 and STAT3 proteins  
148 expression in colon cancer tissue using immunostaining (Fig. 5a). Further, Western blots  
149 confirmed Jak2 and STAT3 enhance expression tumors in AOM/DSS induced VDR<sup>ΔIEC</sup> mice (Fig.  
150 5b). But VDR deletion did change the expression of STAT1 and STAT5 in the colon tumor tissue  
151 (data not shown). Interestingly, without any treatment, VDR deletion led to reduced STAT3 and  
152 Jak2 in the basal level of cells at the protein level and mRNA level (Fig. 5c and 5d). Further, we  
153 identified that VDR protein bound to the Jak2 promoter (TGAAGTTCTGAGAATTCA) by CHIP

154 assay (Fig. 5e). Taken together, our observations show that absence of intestinal epithelial VDR  
155 leads to the hyperfunction of JAK/STAT3 signaling in inflammation.

156

### 157 **Gut microbiome from VDR $\Delta$ IEC mice activates the JAK/STAT signaling in colonoids**

158 Using the stem-cell derived colonoids systems (Fig. 6a), we further investigated the influence of  
159 intestinal VDR during the activation of the JAK/STAT signaling. PCNA, a proliferation marker, and  
160  $\beta$ -catenin were increased in the VDR $\Delta$ IEC feces treated group followed by activation of stat3  
161 (human colonoids in Fig. 6b). The similar hyperregulation of STAT3 was also observed in the  
162 mouse colonoids treated with microbiome from VDR $\Delta$ IEC mice (Fig. 6c). We then treated the  
163 organoid with static, a STAT3 inhibitor. The total stat3 were decreased compare to the no-static  
164 treated mouse colonoids (Fig. 6d). However, the expressions of stat3 and  $\beta$ -catenin in the VDR $\Delta$ IEC  
165 group were still higher than the VDR<sup>LoxP</sup> group (Fig. 6d). We observed the similar effect of static  
166 in inhibiting the microbiome-activation of Jak2/ STAT3 signaling the mouse colonoids (Fig. 6e).  
167 Interestingly, static treatment also reduced the proliferation regulator  $\beta$ -catenin and the  
168 proliferation marker PCNA in colonoids.

169

### 170 **Reduced VDR and enhanced bacteria in human colon cancer tissue**

171 VDR expression was decreased in the AOM-DSS induced colon cancer model (Fig. 7a). We  
172 continued to explore VDR in human colorectal colon samples. Our data showed that increased  
173 Jak2 and STAT3 were associated with the reduction of intestinal VDR in human CRC intestines  
174 (Fig. 7b), suggesting that the JAK/STAT3 is upregulated in human CRC with protective VDR.  
175 Interestingly, we identified bacteria in human colorectal colon samples. FISH data showed that  
176 *Bacteroides fragilis* in tumors from patients with CRC (Fig. 7c).

177

178 **Discussion**

179 In the current study, we have demonstrated that VDR deficiency in intestine leads to bacterial  
180 profile shift from normal to susceptible carcinogenesis. VDR<sup>ΔIEC</sup> mice have higher tumor numbers  
181 with tumor location shifted from distal to proximal colon. Enhanced bacterial staining was found  
182 in tumors. Microbial metabolites from VDR<sup>ΔIEC</sup> mice showed elevated secondary bile acids, which  
183 is consistent with the observations in human CRC. Furthermore, our study provides the  
184 mechanism of VDR dysfunction leading to dysbiosis and tumorigenesis through the  
185 hyperfunctioned Jak2. Fecal samples from VDR<sup>ΔIEC</sup> mice enhance the STAT3 activation in human  
186 and mouse organoids. A JAK/STAT inhibitor abolished the microbiome-induced activation of  
187 STAT3. Our study fills the gaps by revealing mechanisms that are important to normal intestinal  
188 homeostasis and to chronic inflammation and dysbiosis, thus suggesting new therapeutic targets  
189 for restoring VDR functions in colitis-associated colon cancer (Fig. 7d working model).

190  
191 Epidemiological and experimental studies have indicated a protective action of vitamin D against  
192 colorectal cancer [22-27]. Vitamin D<sub>3</sub> exerts its chemopreventive activity by interrupting a crosstalk  
193 between tumor epithelial cells and the tumor microenvironment in a VDR-dependent manner [23].  
194 Moreover, there is increasing interests regarding the use of vitamin D compounds for disease  
195 prevention and therapy [28]. If we do not understand the mechanism of the receptor of vitamin D,  
196 vitamin D taken by people may not be used effectively and efficiently. Hence, our current study  
197 fills the gap by characterizing the precise role for intestinal epithelial VDR in colon cancer models.

198  
199 Endogenous enteric bacteria play a crucial role in the pathogenesis of colon cancer [29].  
200 Dysregulation of bacterial-host interactions can result in chronic inflammatory and development  
201 of cancer [30, 31]. Multiple mechanisms of VDR affects cancers have been found, focusing on  
202 the host factors, e.g. beta-catenin pathway and inflammation [32]. However, very little is known  
203 about the physiological effects and molecular mechanisms responsible for intestinal epithelial



204 VDR regulation of the microbiome community. Our study on VDR regulation of gut bacteria has  
205 demonstrated a microorganism-induced program of epithelial cell homeostasis and repair in the  
206 intestine [10, 33]. Abundance of Parabacteroides affected by VDR signaling in both human and  
207 mouse samples [8]. However, the specific relationship between the function of intestinal VDR and  
208 microbiome in tumorigenesis is not understood [34]. Here, we find out that VDR directly regulates  
209 host-bacterial interactions via JAK/STAT pathways and its downstream genes. Microbial  
210 metabolites from VDR<sup>ΔIEC</sup> mice showed bile acid dysregulation and elevated secondary bile  
211 acids, which is consistent with the observed microbiome markers in human CRC [11, 12].

212

213 We used colonoids and mice lacking intestinal VDR expression to confirm the physiological  
214 relevance and molecular mechanism in epithelial-microbiome interactions. Research of intestinal  
215 VDR provides a framework to understand how the intestinal epithelial cells in the gut may  
216 inadvertently promote the development of cancer as an extension of its normal role in defense  
217 and repair. These insights are important for understanding health as well as disease.

218

219 We note a consistent link between low vitamin D/VDR signaling and high intestinal inflammation.  
220 Our studies suggest that cells lacking VDR are in a pre-inflammatory state [10, 35, 36] and  
221 overexpression of VDR substantially reduced inflammation in VDR<sup>-/-</sup> cells [35]. VDR is also  
222 identified as a suppressor of IFN- $\alpha$ -induced signaling through the JAK-STAT pathway [37]. The  
223 JAK/STAT pathway plays a critical role in intestinal and microbial homeostasis [38]. The  
224 JAK/STAT inhibitors have been recently tested as novel biological therapeutic strategies in  
225 inflammatory bowel diseases [15]. Because low dose proinflammatory cytokines are sufficient to  
226 induce bacterial endocytosis by epithelial cells, sub-clinical or low-grade changes below the  
227 threshold may tip the balance of tolerance towards full blown inflammation owing to subsequent  
228 intracellular microbial sensing and paracellular permeability damage. VDR expression increases

229 epithelial integrity and attenuates inflammation. Thus, it is not surprising that the mucosal  
230 inflammation associated with VDR downregulation in intestine contributes to the initiation and  
231 progression of colon cancer.

232

## 233 **Conclusion**

234 We provide a definitive characterization of the intestinal epithelial VDR in regulating diversity of  
235 the microbiome and colon cancer. It opens a new direction in the understanding of the microbial-  
236 VDR interactions in inflammation and cancer. It indicates a new target — microbiome and VDR for  
237 prevention of cancer. VDR expression was decreased in the colon cancer mice after AOM/DSS  
238 treatment, which is consistent with the clinical observation in colitis-associated colon cancer  
239 patients [39]. In the future, we could also consider restoring the protective role of intestinal  
240 epithelia VDR using VDR activators or probiotics in CRC. Understanding of the abnormal  
241 interactions between host and microbiome will aid in developing novel strategies for managing  
242 chronic inflammatory diseases and cancers.

243

## 244 **Materials and Methods**

### 245 **Human tissue samples**

246 This study was performed in accordance with approval from the University of Rochester Ethics  
247 Committee (RSRB00037178). Colorectal tissue samples were obtained from 10 CRC patients  
248 with neoplasia and 10 patients without neoplasia patients (49–74years old). Human endoscopy  
249 samples in UIC hospital were collected for human organoids culture (IRB number 2017-0384).

250

### 251 **Animals**

252 VDR<sup>LoxP</sup> mice were originally reported by Dr. Geert Carmeliet [40]. VDR<sup>ΔIEC</sup> mice were obtained  
253 by crossing the VDR<sup>LoxP</sup> mice with villin-cre mice (Jackson Laboratory, 004586), as we previously  
254 reported [7]. Experiments were performed on 2–3 months old mice including male and female.

255 Mice were provided with water ad libitum and maintained in a 12 h dark/light cycle. The animal  
256 work was approved by the University of Rochester (When Dr. Sun's lab was at University of  
257 Rochester), Rush University Animal Resources committee, and UIC Office of Animal Care.

258

### 259 **Induction of colon cancer by AOM-DSS in mice**

260 Mice were treated with 10mg/kg of AOM (Sigma-Aldrich, Milwaukee, WI, USA) by intraperitoneal  
261 injection as previously described [41]. After a 7-day recovery period, mice received three cycles  
262 of 2% DSS in the drinking water. The initial sample size was 30 mice in the control group with no  
263 treatment and 30 in each experimental group. Tumor counts and measurements were performed  
264 in a blinded fashion under a stereo-dissecting microscope (Nikon SMZ1000, Melville, NY, USA).  
265 Microscopic analysis was performed for severity of inflammation and dysplasia on hematoxylin  
266 and eosin-stained 'Swiss rolled' colons by a gastrointestinal pathologist blinded to treatment  
267 conditions. Mice were scarified under anaesthesia.

268

### 269 **Cell culture**

270 HCT116 cells were grown in high glucose Dulbecco's Modified Eagle Medium (DMEM) (Hyclone,  
271 SH30243.01) containing 10% (v/v) fetal bovine serum (GEMINI, 900-108), 50 µg/ml streptomycin,  
272 and 50 U/ml penicillin (Mediatech, Inc., 30-002CI), as previously described [42, 43].

273

### 274 **Colonoids cultures and treatment with mice feces**

275 C57BL/6J mice colonoids were prepared and maintained as previously described [44, 45]. Mini  
276 gut medium (advanced DMEM/F12 supplemented with HEPES, L-glutamine, N2, and B27) was  
277 added to the culture, along with R-Spondin, Noggin, EGF, and Wnt-3a. At day 7 after passage,  
278 colonoids were colonized by indicated mice feces for 2 hours, then washed, and incubated for 2  
279 hours in Mini gut medium with Gentamicin (500 µg/ml).

280 Human organoids were developed using endoscopy samples in UIC hospital. Crypts were  
281 released from colon tissue by incubation for 30 min at 4 °C in PBS containing 2 mM EDTA.  
282 Isolated crypts were counted and pelleted. A total of 500 crypts were mixed with 50 µl of  
283 Matrigel (BD Bioscience) and plated in 24-well plates [46]. The colonoids were maintained in  
284 Human IntestiCult™ Organoid Growth Medium (STEMCELL Technologies Inc.).

285

286 Fresh feces were collected from 5 healthy VDR<sup>LoxP</sup> or VDR<sup>ΔIEC</sup> mice (8 weeks) and then well-  
287 mixed. 100mg feces homogenized in 6 ml Hanks and centrifuged for 30 s at 300 rpm, 4°C, to  
288 pellet the particulate matter. Organoids were treated with 250 µl feces supernatant for 2 hours,  
289 washed the organoids 3x with Hanks, and then incubated the cells in regular organoids culture  
290 medium for 2 hours [47].

291

## 292 **Western blot analysis and antibodies**

293 Mouse colonic epithelial cells were collected by scraping the tissue from the colon of the mouse,  
294 including the proximal and distal regions [42, 48]. The cells were sonicated in lysis buffer (10 mM  
295 Tris, pH 7.4, 150 mM NaCl, 1 mM EDTA, 1 mM EGTA, pH 8.0, 1% Triton X-100) with 0.2 mM  
296 sodium ortho-vanadate, and protease inhibitor cocktail. The protein concentration was measured  
297 using the BioRad Reagent (BioRad, Hercules, CA, USA). Cultured cells were rinsed twice with  
298 ice-cold HBSS, lysed in protein loading buffer (50 mM Tris, pH 6.8, 100 mM dithiothreitol, 2% SDS,  
299 0.1% bromophenol blue, 10% glycerol), and then sonicated. Equal amounts of protein were  
300 separated by SDS-polyacrylamide gel electrophoresis, transferred to nitrocellulose, and  
301 immunoblotted with primary antibodies. The following antibodies were used: anti-STAT3 (Cell  
302 Signaling Technology, 9132), anti-Jak2 (Cell Signaling Technology, 3230), anti-VDR (Santa Cruz  
303 Biotechnology, SC-13133), anti-Villin (Santa Cruz Biotechnology, SC-7672), anti-p-β-catenin  
304 (Cell Signaling Technology, 9566), anti-β-catenin (BD Biosciences, 610154), anti-PCNA (Santa  
305 Cruz Biotechnology, SC-25280), anti-LC3B (Cell Signaling Technology, 2775), or anti-β-actin

306 (Sigma-Aldrich, A5316) antibodies and were visualized by ECL (Thermo Fisher Scientific, 32106).  
307 Membranes that were probed with more than one antibody were stripped before re-probing.

308

### 309 **Immunofluorescence**

310 Colonic tissues were freshly isolated and embedded in paraffin wax after fixation with 10% neutral  
311 buffered formalin. Immunofluorescence was performed on paraffin-embedded sections (4  $\mu$ m),  
312 after preparation of the slides as described previously [43] followed by incubation for 1 hour in  
313 blocking solution (2% bovine serum albumin, 1% goat serum in HBSS) to reduce nonspecific  
314 background. The tissue samples were incubated overnight with primary antibodies at 4°C. The  
315 following antibodies were used: anti-CD3, anti-CD11B and anti-CD68 (Santa Cruz Biotechnology),  
316 Slides were washed 3 times for 5 minutes each at room temperature in wash buffer. Samples  
317 were then incubated with secondary antibodies (goat anti-rabbit Alexa Fluor 488, Molecular  
318 Probes, CA; 1:200) for 1 hour at room temperature. Tissues were mounted with SlowFade  
319 Antifade Kit (Life technologies, s2828, Grand Island, NY, USA), followed by a coverslip, and the  
320 edges were sealed to prevent drying. Specimens were examined with a Zeiss laser scanning  
321 microscope LSM 710 (Carl Zeiss Inc., Oberkochen, Germany).

322

### 323 **Fluorescence in situ hybridization**

324 Fluorescent in situ hybridization [49] was performed using antisense ssDNA probes targeting the  
325 bacterial 16S rRNA. Bfra602 probe (5'- GAGCCGCAAACCTTTCACAA -3') for *Bacteroides fragilis*  
326 group [50]. Prior to performing the FISH assay 5  $\mu$ m tissue sections were baked over night at  
327 55 °C. Tissue sections were deparaffinized in xylene, dehydrated with 100% ethanol, air dried,  
328 incubated in 0.2M HCl for 20min and heated in 1 mM sodium thiocyanate at 80 °C for 10 minutes.  
329 Samples were pepsin digested (4% pepsin in 0.01N HCl) for 20 minutes at 37 °C, washed slides  
330 in wash buffer (0.3 M NaCl, 0.03 M sodium citrate, pH 7, and 0. 1% SDS) and fixed the slides in  
331 10% buffered formalin for 15min, washed and dried the slides, and hybridized with the probes at

332 5 ng/μl concentration each for 5 min at 96°C in hybridization buffer (0.9 M NaCl, 30% formamide,  
333 20 mM Tris-HCl (pH 7.4), and 0.01% sodium dodecyl sulfate (SDS) and incubated at 37°C  
334 overnight. Slides were washed 4 times for 5 minutes each at 45°C in wash buffer. For visualization  
335 of the epithelial cell nuclei, the slides were counterstained with 4', 6'-diamidino-2-phenylindole  
336 (DAPI) / antifade solution. Slides were examined with a Zeiss laser scanning microscope LSM  
337 710 (Carl Zeiss Inc., Oberkochen, Germany).

338

### 339 **Mouse cytokines**

340 Mouse blood samples were collected by cardiac puncture and placed in tubes containing EDTA  
341 (10 mg/ml). Mouse cytokines were measured using a mouse cytokine 10-Plex Panel kit  
342 (Invitrogen, Carlsbad, CA, USA) according to the manufacturer's instructions. Briefly, beads of  
343 defined spectral properties were conjugated to protein-specific capture antibodies and added  
344 along with samples (including standards of known protein concentration, control samples, and  
345 test samples) into the wells of a filter-bottom microplate, where proteins bound to the capture  
346 antibodies over the course of a 2-hour incubation. After washing the beads, protein-specific  
347 biotinylated detector antibodies were added and incubated with the beads for 1 hour. After  
348 removal of excess biotinylated detector antibodies, the streptavidin-conjugated fluorescent  
349 protein R-phycoerythrin (streptavidin-RPE) was added and allowed to incubate for 30 minutes.  
350 After washing to remove unbound streptavidin-RPE, the beads were analyzed with the Luminex  
351 detection system (PerkinElmer CS1000 Autoplex Analyzer).

352

### 353 **Real Time quantitative PCR**

354 Total RNA was extracted from epithelial cell monolayers or mouse colonic epithelial cells using  
355 TRIzol reagent (Thermo Fisher Scientific, 15596026). The RNA integrity was verified by gel  
356 electrophoresis. RNA reverse transcription was done using the iScript cDNA synthesis kit (Bio-  
357 Rad Laboratories, 1708891) according to the manufacturer's directions. The RT-cDNA reaction

358 products were subjected to quantitative real-time PCR using the MyiQ single-color real-time PCR  
359 detection system (Bio-Rad Laboratories, Hercules, CA, USA) and iTaq™ Universal SYBR green  
360 supermix (Bio-Rad Laboratories, 1725121) according to the manufacturer's directions. All  
361 expression levels were normalized to  $\beta$ -actin levels of the same sample. Percent expression was  
362 calculated as the ratio of the normalized value of each sample to that of the corresponding  
363 untreated control cells. All real-time PCR reactions were performed in triplicate. Primer sequences  
364 were designed using Primer-BLAST or were obtained from Primer Bank primer pairs listed in  
365 Table S1.

366

#### 367 **Real-time PCR measurement of bacterial DNA**

368 Mice feces samples DNA was extracted using stool DNA Kit (Omega bio-tek, Norcross, GA, USA)  
369 according to the manufacturer's instructions. 16S rDNA PCR reactions were used the MyiQ  
370 single-color real-time PCR detection system (Bio-Rad Laboratories, Hercules, CA, USA) and  
371 iTaq™ Universal SYBR green supermix (Bio-Rad Laboratories, 1725121) according to the  
372 manufacturer's directions. Primers specific to 18S rRNA were used as an endogenous control to  
373 normalize loading between samples [51]. The relative amount of 16S rDNA in each sample was  
374 estimated using the  $\Delta\Delta$ CT. Primer sequences were designed using Primer-BLAST or were  
375 obtained from Primer Bank primer pairs listed in Table S2.

376

#### 377 **Chromatin immunoprecipitation (CHIP) assay**

378 Binding of VDR to the Jak2 promoter was investigated using the CHIP assay as described  
379 previously [36]. Briefly, HCT116 cells were treated with 1% formaldehyde for 10 min at 37°C. Cells  
380 were washed twice in ice-cold phosphate buffered saline containing protease inhibitor cocktail  
381 tablets (Roche). Cells were scraped into conical tubes, pelleted and lysed in SDS Lysis Buffer.  
382 The lysate was sonicated to shear DNA into fragments of 200–1000 bp (4 cycles of 10 s

383 sonication, 10 s pausing, Branson Sonifier 250, USA). The chromatin samples were pre-cleared  
384 with salmon sperm DNA–bovine serum albumin-sepharose beads, then incubated overnight at 4  
385 °C with VDR antibody (Santa Cruz Biotechnology). Immune complexes were precipitated with  
386 salmon sperm DNA–bovine serum albumin-sepharose beads. DNA was prepared by treatment  
387 with proteinase K, extraction with phenol and chloroform, and ethanol precipitation. Searching  
388 mouse ATG16L1 gene, we found a similar sequence as the VDRE sequence “(G/A)G(G/T)TCA”.  
389 We then designed primers for CHIP. PCR was performed using the following promoter specific  
390 primers: Jak2 forward, 5'- TGAATCCCAGGACACATTT-3'; reverse, 5'-  
391 GGTAAGCCACTGAAGGTT- 3'.

392

### 393 **Histology of Intestine**

394 Intestines were harvested, fixed in 10% formalin (pH 7.4), processed, and paraffin embedded.  
395 Sections (5µm) were stained with H&E. For immunostaining, antigens were retrieved by 10-  
396 minute boiling in 10 mM citrate (pH 6.0). The slides were stained with antibodies as previously  
397 described [43]. Blinded histological inflammatory scores were performed by a validated scoring  
398 system by a trained pathologist [52].

399

### 400 **LPS detection**

401 LPS in serum samples was measured with Limulus amoebocyte lysate (LAL) chromogenic  
402 endpoint assays (HIT302, Hycult Biotech, Plymouth Meeting, PA, USA) according to the  
403 manufacturer's indications. The samples were diluted 1:4 with endotoxin-free water and then  
404 heated at 75°C for 5 min in a warm plate to denature the protein before the reaction. A standard  
405 curve was generated and used to calculate the concentrations, which were expressed as EU/ml,  
406 in the blood samples.

407



## 408 **Quantification of Fecal and Serum Lipocalin 2 (Lcn-2) by ELISA**

409 Freshly collected fecal samples were reconstituted in PBS containing 0.1% Tween 20 (100 mg/ml)  
410 and vortexed for 20 min to get a homogenous fecal suspension. These samples were then  
411 centrifuged for 10 min at 12,000 rpm and 4°C. Clear supernatants were collected. Lcn-2 levels  
412 were estimated in the supernatants using Duoset murine Lcn-2 ELISA kit (R&D Systems,  
413 Minneapolis, MN), as described in our previous study [53].

414

## 415 **Mucosa microbial and fecal 454 Pyrosequencing**

416 The tubes for microbial sampling were autoclaved and then irradiated with ultraviolet light to  
417 destroy the environmental bacterial DNA. The mice were then anesthetized and dissected. Fecal  
418 isolated freshly from the gut and placed into the specially prepared tubes, as described in our  
419 previously published papers [54, 55]. The samples were kept at low temperature with dry ice and  
420 mailed to Research and Testing Laboratory, Lubbock, TX, for 454 pyrosequencing. The V4-V6  
421 region of the samples was amplified in Research and Testing Laboratory, Lubbock, TX, for  
422 pyrosequencing using a forward and reverse fusion primer. The sequences were denoised,  
423 subjected to quality checking. Taxonomic identifications were assigned by queries against NCBI.

424

## 425 **Sample Preparation for Metabolites**

426 Fecal samples were prepared using the automated MicroLab STAR® system from Hamilton  
427 Company. Several recovery standards were added prior to the first step in the extraction process  
428 for QC purposes. To remove protein, dissociate small molecules bound to protein or trapped in  
429 the precipitated protein matrix, and to recover chemically diverse metabolites, proteins were  
430 precipitated with methanol under vigorous shaking for 2 min (Glen Mills GenoGrinder 2000)  
431 followed by centrifugation. The resulting extract was divided into five fractions: two for analysis by  
432 two separate reverse phase (RP)/UPLC-MS/MS methods with positive ion mode electrospray

433 ionization (ESI), one for analysis by RP/UPLC-MS/MS with negative ion mode ESI, one for  
434 analysis by HILIC/UPLC-MS/MS with negative ion mode ESI, and one sample was reserved for  
435 backup. Samples were placed briefly on a TurboVap® (Zymark) to remove the organic solvent.  
436 The sample extracts were stored overnight under nitrogen before preparation for analysis.

#### 437 **Metabolite analysis**

438 For metabolite experiment, 33 of divided into VDR<sup>ΔIEC</sup> (N= 17) and control VDR<sup>LoxP</sup> (N=16) groups.  
439 All mice were housed in specific pathogen-free environments under a controlled condition of 12 h  
440 light/12 h dark cycle at 20–22 °C and 45 ± 5% humidity, with free access to food and ultrapure  
441 water. At 16 weeks of age fecal contents of each mouse were carefully collected in separate  
442 Eppendorf tubes, labeled with a unique identification number and stored at –80 °C until shipped.  
443 Samples were transported to Metabolon Inc, NC, USA in dry ice by overnight shipment for  
444 analysis.

445 Following receipt, samples were assigned a unique identifier by the LIMS (laboratory information  
446 management system) and immediately stored at -80°C until processed. Samples were prepared  
447 using the automated MicroLab STAR® system from Hamilton Company. First proteins and other  
448 associated small molecules were precipitated then diverse metabolites were recovered by  
449 grinding and centrifugation. The resulting extract was analyzed by two separate reverse phase  
450 (RP)/UPLC-MS/MS methods with positive ion mode electrospray ionization (ESI), or with negative  
451 ion mode ESI, and one by HILIC/UPLC-MS/MS with negative ion mode ESI. Several types of  
452 controls were analyzed along with the experimental samples to ensure accurate and consistent  
453 identification. Ultrahigh Performance Liquid Chromatography-Tandem Mass Spectroscopy  
454 (UPLC-MS/MS) was utilized as an analyzer. Metabolon's hardware and software were used to  
455 extract the raw data, followed by the identification of peak and QC (Quality Check). These  
456 systems are built on a web-service platform utilizing Microsoft's NET technologies.

457

#### 458 **Microbiome data analysis**

459 Differences in microbial communities between VDR<sup>LoxP</sup> and VDR<sup>ΔIEC</sup> groups were analyzed, as we  
460 did in previous studies [54, 55]. Briefly, Principal Coordinates Analysis (PCoA) of unweighted  
461 UniFrac distances plots were plotted using quantitative insights into microbial ecology (QIIME)  
462 [56]. To determine differences in microbiota composition between the animal groups, the analysis  
463 of similarities (ANOSIM) function in the statistical software package PRIMER 6 (PRIMER-E Ltd.,  
464 Luton, UK) was used on the unweighted UniFrac distance matrixes [57].

465

#### 466 **Statistical Analysis**

467 Metabolite data were expressed as fold change ratio, all other data are expressed as the mean ±  
468 SD. All statistical tests were 2-sided. The p values <0.05 were considered statistically significant.  
469 For metabolite data, following log transformation and imputation of missing values, if any, with the  
470 minimum observed value for each compound, ANOVA contrasts and Welch's two-sample *t*-test  
471 were used to identify biochemicals that differed significantly between experimental groups. For  
472 other data analyses, the differences between samples were analyzed using Student's *t*-test for  
473 two-groups comparison, one-way ANOVA for more than two-groups comparison, respectively.

474

475

476 **Declarations**

- 477       • Ethics approval and consent to participate

478       The animal work was approved by the University of Rochester (When Dr. Sun's lab was at  
479       University of Rochester), Rush University Animal Resources committee, and UIC Office of  
480       Animal Care.

481       Consent to participate is not applicable.

- 482       • Consent for publication

483       Not applicable.

- 484       • Availability of data and material

485       Data and materials are available upon request.

- 486       • Competing interests

487       The authors declare that they have no conflict of interest.

- 488       • Funding

489       We would like to acknowledge the UIC Cancer Center, the NIDDK/National Institutes of Health  
490       grant R01 DK105118, R01DK114126, and DOD BC160450P1 to Jun Sun. The study sponsors  
491       play no role in the study design, data collection, analysis, and interpretation of data.

- 492       • Authors' contributions

493       YZ, RL, SW: acquisition, analysis and interpretation of data; drafting of the manuscript; statistical  
494       analysis. IC: metabolite data analysis. DZ: Pathological, technical and material support. YX:

495 statistical analysis, microbiome data analysis, and drafting of the manuscript. JS: study concept  
496 and design; analysis and interpretation of data; writing the manuscript for important intellectual  
497 content, obtained funding, and study supervision.

498 • Acknowledgements

499 We would like to thank Eric Xia and Jason Xia for helping with proofreading.

500

### 501 **Availability of supporting data**

502

503 Sequence files and metadata for all samples used in this study have been deposited in

504 <https://www.ncbi.nlm.nih.gov/bioproject/593562>

505 SubmissionID: SUB6615727

506 BioProject ID: PRJNA593562

### 507 **Abbreviations**

508 1,25(OH)<sub>2</sub>D<sub>3</sub>: 1 $\alpha$ ,25-dihydroxy vitamin D<sub>3</sub>

509 AOM: azoxymethane

510 BrdU: bromodeoxyuridine

511 CHIP: Chromatin immunoprecipitation

512 CRC: colon rectal cancer

513 DSS: dextran sodium sulfate

514 FISH: Fluorescent in situ hybridization

515 IECs: Intestinal epithelial cells

516 Lcn-2: Lipocalin 2

517 IL10: Interleukin 10

518 Jak: Janus kinases

- 519 LPS: Lipopolysaccharides
- 520 PCNA: Proliferating cell nuclear antigen
- 521 STAT3: Signal transducer and activator of transcription 3
- 522 TUNEL: terminal transferase-mediated dUTP nick end labeling
- 523 VDR: vitamin D receptor
- 524

525 **References**

- 526 1. McCullough ML, Zoltick ES, Weinstein SJ, Fedirko V, Wang M, Cook NR, Eliassen AH,  
527 Zeleniuch-Jacquotte A, Agnoli C, Albanes D, et al: **Circulating Vitamin D and Colorectal**  
528 **Cancer Risk: An International Pooling Project of 17 Cohorts.** *J Natl Cancer Inst* 2018.
- 529 2. Ferrer-Mayorga G, Gomez-Lopez G, Barbachano A, Fernandez-Barral A, Pena C, Pisano  
530 DG, Cantero R, Rojo F, Munoz A, Larriba MJ: **Vitamin D receptor expression and**  
531 **associated gene signature in tumour stromal fibroblasts predict clinical outcome in**  
532 **colorectal cancer.** *Gut* 2017, **66**:1449-1462.
- 533 3. Vaughan-Shaw PG, Zgaga L, Ooi LY, Theodoratou E, Timofeeva M, Svinti V, Walker M,  
534 O'Sullivan F, Ewing A, Johnston S, et al: **Low plasma vitamin D is associated with**  
535 **adverse colorectal cancer survival after surgical resection, independent of**  
536 **systemic inflammatory response.** *Gut* 2019:1-9.
- 537 4. Ng K, Nimeiri HS, McCleary NJ, Abrams TA, Yurgelun MB, Cleary JM, Rubinson DA,  
538 Schrag D, Miksad R, Bullock AJ, et al: **Effect of High-Dose vs Standard-Dose Vitamin**  
539 **D3 Supplementation on Progression-Free Survival Among Patients With Advanced**  
540 **or Metastatic Colorectal Cancer: The SUNSHINE Randomized Clinical Trial.** *JAMA*  
541 2019, **321**:1370-1379.
- 542 5. Haussler MR, Whitfield GK, Haussler CA, Hsieh J-C, Thompson PD, Selznick SH,  
543 Dominguez CE, Jurutka PW: **The nuclear vitamin D receptor: biological and molecular**  
544 **regulatory properties revealed.** *J Bone and Mineral Research* 1998, **13**:325-349.
- 545 6. Thorne JaC, J. M.: *The molecular cell biology of VDR.* Springer Science & Business  
546 Media; 2010.
- 547 7. Wu S, Zhang YG, Lu R, Xia Y, Zhou D, Petrof EO, Claud EC, Chen D, Chang EB,  
548 Carmeliet G, Sun J: **Intestinal epithelial vitamin D receptor deletion leads to defective**  
549 **autophagy in colitis.** *Gut* 2015, **64**:1082-1094.

- 550 8. Wang J, Thingholm LB, Skieceviciene J, Rausch P, Kummen M, Hov JR, Degenhardt F,  
551 Heinsen FA, Ruhlemann MC, Szymczak S, et al: **Genome-wide association analysis**  
552 **identifies variation in vitamin D receptor and other host factors influencing the gut**  
553 **microbiota.** *Nat Genet* 2016, **48**:1396-1406.
- 554 9. Sun J: **VDR/vitamin D receptor regulates autophagic activity through ATG16L1.**  
555 *Autophagy* 2016, **12**:1057-1058.
- 556 10. Wu S, Liao AP, Xia Y, Li YC, Li JD, Sartor RB, Sun J: **Vitamin D receptor negatively**  
557 **regulates bacterial-stimulated NF-kappaB activity in intestine.** *Am J Pathol* 2010,  
558 **177**:686-697.
- 559 11. Thomas AM, Manghi P, Asnicar F, Pasolli E, Armanini F, Zolfo M, Beghini F, Manara S,  
560 Karcher N, Pozzi C, et al: **Metagenomic analysis of colorectal cancer datasets**  
561 **identifies cross-cohort microbial diagnostic signatures and a link with choline**  
562 **degradation.** *Nat Med* 2019, **25**:667-678.
- 563 12. Wirbel J, Pyl PT, Kartal E, Zych K, Kashani A, Milanese A, Fleck JS, Voigt AY, Palleja A,  
564 Ponnudurai R, et al: **Meta-analysis of fecal metagenomes reveals global microbial**  
565 **signatures that are specific for colorectal cancer.** *Nat Med* 2019, **25**:679-689.
- 566 13. Buchert M, Burns CJ, Ernst M: **Targeting JAK kinase in solid tumors: emerging**  
567 **opportunities and challenges.** *Oncogene* 2016, **35**:939-951.
- 568 14. Lu R, Zhang YG, Sun J: **STAT3 activation in infection and infection-associated**  
569 **cancer.** *Mol Cell Endocrinol* 2017, **451**:80-87.
- 570 15. D'Amico F, Fiorino G, Furfaro F, Allocca M, Danese S: **Janus kinase inhibitors for the**  
571 **treatment of inflammatory bowel diseases: developments from phase I and phase II**  
572 **clinical trials.** *Expert Opin Investig Drugs* 2018, **27**:595-599.
- 573 16. Bird RP, Good CK: **The significance of aberrant crypt foci in understanding the**  
574 **pathogenesis of colon cancer.** *Toxicol Lett* 2000, **112-113**:395-402.



- 575 17. Gerard P: **Metabolism of cholesterol and bile acids by the gut microbiota.** *Pathogens*  
576 2013, **3**:14-24.
- 577 18. Sagar NM, Cree IA, Covington JA, Arasaradnam RP: **The interplay of the gut**  
578 **microbiome, bile acids, and volatile organic compounds.** *Gastroenterol Res Pract*  
579 2015, **2015**:398585.
- 580 19. Staley C, Weingarden AR, Khoruts A, Sadowsky MJ: **Interaction of gut microbiota with**  
581 **bile acid metabolism and its influence on disease states.** *Appl Microbiol Biotechnol*  
582 2017, **101**:47-64.
- 583 20. Li T, Apte U: **Bile Acid Metabolism and Signaling in Cholestasis, Inflammation, and**  
584 **Cancer.** *Adv Pharmacol* 2015, **74**:263-302.
- 585 21. Chassaing B, Srinivasan G, Delgado MA, Young AN, Gewirtz AT, Vijay-Kumar M: **Fecal**  
586 **lipocalin 2, a sensitive and broadly dynamic non-invasive biomarker for intestinal**  
587 **inflammation.** *PLoS One* 2012, **7**:e44328.
- 588 22. Protiva P, Cross HS, Hopkins ME, Kallay E, Bises G, Dreyhaupt E, Augenlicht L, Lipkin  
589 M, Lesser M, Livote E, Holt PR: **Chemoprevention of colorectal neoplasia by**  
590 **estrogen: potential role of vitamin D activity.** *Cancer Prev Res (Phila Pa)* 2009, **2**:43-  
591 51.
- 592 23. Kaler P, Augenlicht L, Klampfer L: **Macrophage-derived IL-1beta stimulates Wnt**  
593 **signaling and growth of colon cancer cells: a crosstalk interrupted by vitamin D3.**  
594 *Oncogene* 2009, **28**:3892-3902.
- 595 24. Fichera A, Little N, Dougherty U, Mustafi R, Cerda S, Li YC, Delgado J, Arora A, Campbell  
596 LK, Joseph L, et al: **A vitamin D analogue inhibits colonic carcinogenesis in the**  
597 **AOM/DSS model.** *J Surg Res* 2007, **142**:239-245.
- 598 25. Nagpal S, Lu J, Boehm MF: **Vitamin D analogs: mechanism of action and therapeutic**  
599 **applications.** *Curr Med Chem* 2001, **8**:1661-1679.

- 600 26. Palmer HG, Sanchez-Carbayo M, Ordonez-Moran P, Larriba MJ, Cordon-Cardo C, Munoz  
601 **A: Genetic signatures of differentiation induced by 1alpha,25-dihydroxyvitamin D3**  
602 **in human colon cancer cells.** *Cancer Res* 2003, **63**:7799-7806.
- 603 27. Chan AT, Giovannucci EL: **Primary prevention of colorectal cancer.** *Gastroenterology*  
604 2010, **138**:2029-2043 e2010.
- 605 28. Gombart AF, Luong QT, Koeffler HP: **Vitamin D compounds: activity against microbes**  
606 **and cancer.** *Anticancer Res* 2006, **26**:2531-2542.
- 607 29. Wong SH, Zhao L, Zhang X, Nakatsu G, Han J, Xu W, Xiao X, Kwong TNY, Tsoi H, Wu  
608 WKK, et al: **Gavage of Fecal Samples From Patients With Colorectal Cancer**  
609 **Promotes Intestinal Carcinogenesis in Germ-Free and Conventional Mice.**  
610 *Gastroenterology* 2017, **153**:1621-1633 e1626.
- 611 30. Terzic J, Grivennikov S, Karin E, Karin M: **Inflammation and colon cancer.**  
612 *Gastroenterology*, **138**:2101-2114 e2105.
- 613 31. Song M, Chan AT, Jun J: **Features of the Gut Microbiome, Diet, and Environment That**  
614 **Influence Risk of Colorectal Cancer.** *Gastroenterology* 2020.
- 615 32. Sun J: **The Role of Vitamin D and Vitamin D Receptors in Colon Cancer.** *Clin Transl*  
616 *Gastroenterol* 2017, **8**:e103.
- 617 33. Abreu MT: **Toll-like receptor signalling in the intestinal epithelium: how bacterial**  
618 **recognition shapes intestinal function.** *Nat Rev Immunol* 2010, **10**:131-144.
- 619 34. De Mattia E, Cecchin E, Montico M, Labriet A, Guillemette C, Dreussi E, Roncato R,  
620 Bignucolo A, Buonadonna A, D'Andrea M, et al: **Association of STAT-3 rs1053004 and**  
621 **VDR rs11574077 With FOLFIRI-Related Gastrointestinal Toxicity in Metastatic**  
622 **Colorectal Cancer Patients.** *Front Pharmacol* 2018, **9**:367.
- 623 35. Sun J, Kong J, Duan Y, Szeto FL, Liao A, Madara JL, Li YC: **Increased NF-kappaB**  
624 **activity in fibroblasts lacking the vitamin D receptor.** *Am J Physiol Endocrinol Metab*  
625 2006, **291**:E315-322.

- 626 36. Wu S, Xia Y, Liu X, Sun J: **Vitamin D receptor deletion leads to reduced level of**  
627 **IkappaBalpha protein through protein translation, protein-protein interaction, and**  
628 **post-translational modification.** *Int J Biochem Cell Biol* 2010, **42**:329-336.
- 629 37. Lange CM, Gouttenoire J, Duong FH, Morikawa K, Heim MH, Moradpour D: **Vitamin D**  
630 **receptor and Jak-STAT signaling crosstalk results in calcitriol-mediated increase of**  
631 **hepatocellular response to IFN-alpha.** *J Immunol* 2014, **192**:6037-6044.
- 632 38. Heneghan AF, Pierre JF, Kudsk KA: **JAK-STAT and intestinal mucosal immunology.**  
633 *JAKSTAT* 2013, **2**:e25530.
- 634 39. Wada K, Tanaka H, Maeda K, Inoue T, Noda E, Amano R, Kubo N, Muguruma K, Yamada  
635 N, Yashiro M, et al: **Vitamin D receptor expression is associated with colon cancer in**  
636 **ulcerative colitis.** *Oncol Rep* 2009, **22**:1021-1025.
- 637 40. Van Cromphaut SJ, Dewerchin M, Hoenderop JG, Stockmans I, Van Herck E, Kato S,  
638 Bindels RJ, Collen D, Carmeliet P, Bouillon R, Carmeliet G: **Duodenal calcium**  
639 **absorption in vitamin D receptor-knockout mice: functional and molecular aspects.**  
640 *Proc Natl Acad Sci U S A* 2001, **98**:13324-13329.
- 641 41. Greten FR, Karin M: **The IKK/NF-kappaB activation pathway-a target for prevention**  
642 **and treatment of cancer.** *Cancer Lett* 2004, **206**:193-199.
- 643 42. Sun J, Hobert ME, Duan Y, Rao AS, He TC, Chang EB, Madara JL: **Crosstalk between**  
644 **NF-kappaB and beta-catenin pathways in bacterial-colonized intestinal epithelial**  
645 **cells.** *Am J Physiol Gastrointest Liver Physiol* 2005, **289**:129-137.
- 646 43. Lu R, Wu S, Liu X, Xia Y, Zhang YG, Sun J: **Chronic effects of a Salmonella type III**  
647 **secretion effector protein AvrA in vivo.** *PLoS One* 2010, **5**:e10505.
- 648 44. Zhang YG, Wu S, Xia Y, Sun J: **Salmonella-infected crypt-derived intestinal organoid**  
649 **culture system for host-bacterial interactions.** *Physiol Rep* 2014, **2**.
- 650 45. Lu R, Voigt RM, Zhang Y, Kato I, Xia Y, Forsyth CB, Keshavarzian A, Sun J: **Alcohol**  
651 **Injury Damages Intestinal Stem Cells.** *Alcohol Clin Exp Res* 2017, **41**:727-734.

- 652 46. Sato T, Vries RG, Snippert HJ, van de Wetering M, Barker N, Stange DE, van Es JH, Abo  
653 A, Kujala P, Peters PJ, Clevers H: **Single Lgr5 stem cells build crypt-villus structures**  
654 **in vitro without a mesenchymal niche.** *Nature* 2009, **459**:262-265.
- 655 47. Zhang YG, Zhu X, Lu R, Messer JS, Xia Y, Chang EB, Sun J: **Intestinal epithelial HMGB1**  
656 **inhibits bacterial infection via STAT3 regulation of autophagy.** *Autophagy* 2019.
- 657 48. Duan Y, Liao AP, Kuppireddi S, Ye Z, Ciancio MJ, Sun J: **beta-Catenin activity**  
658 **negatively regulates bacteria-induced inflammation.** *Lab Invest* 2007, **87**:613-624.
- 659 49. Barrett JC, Hansoul S, Nicolae DL, Cho JH, Duerr RH, Rioux JD, Brant SR, Silverberg  
660 MS, Taylor KD, Barmada MM, et al: **Genome-wide association defines more than 30**  
661 **distinct susceptibility loci for Crohn's disease.** *Nat Genet* 2008, **40**:955-962.
- 662 50. Franks AH, Harmsen HJ, Raangs GC, Jansen GJ, Schut F, Welling GW: **Variations of**  
663 **bacterial populations in human feces measured by fluorescent in situ hybridization**  
664 **with group-specific 16S rRNA-targeted oligonucleotide probes.** *Appl Environ*  
665 *Microbiol* 1998, **64**:3336-3345.
- 666 51. Fan Y, Dickman KG, Zong WX: **Akt and c-Myc differentially activate cellular metabolic**  
667 **programs and prime cells to bioenergetic inhibition.** *J Biol Chem* 2010, **285**:7324-  
668 7333.
- 669 52. Sellon RK, Tonkonogy S, Schultz M, Dieleman LA, Grenther W, Balish E, Rennick DM,  
670 Sartor RB: **Resident enteric bacteria are necessary for development of spontaneous**  
671 **colitis and immune system activation in interleukin-10-deficient mice.** *Infect Immun*  
672 1998, **66**:5224-5231.
- 673 53. Lu R, Zhang YG, Xia Y, Sun J: **Imbalance of autophagy and apoptosis in intestinal**  
674 **epithelium lacking the vitamin D receptor.** *FASEB J* 2019:fj201900727R.
- 675 54. Wang Y, Hoenig JD, Malin KJ, Qamar S, Petrof EO, Sun J, Antonopoulos DA, Chang EB,  
676 Claud EC: **16S rRNA gene-based analysis of fecal microbiota from preterm infants**  
677 **with and without necrotizing enterocolitis.** *ISME J* 2009, **3**:944-954.

- 678 55. Devkota S, Wang Y, Musch MW, Leone V, Fehlner-Peach H, Nadimpalli A, Antonopoulos  
679 DA, Jabri B, Chang EB: **Dietary-fat-induced taurocholic acid promotes pathobiont**  
680 **expansion and colitis in *Il10*<sup>-/-</sup> mice.** *Nature* 2012, **487**:104-108.
- 681 56. Lozupone C, Knight R: **UniFrac: a new phylogenetic method for comparing microbial**  
682 **communities.** *Appl Environ Microbiol* 2005, **71**:8228-8235.
- 683 57. Xia Y, Sun J, Chen D-G: **Statistical analysis of microbiome data with R.** *Singapore:*  
684 *Springer* 2018.
- 685
- 686

687 **Figure legends**

688 **Fig. 1** Intestinal epithelial cell VDR KO mice developed more tumors. **a** Schematic overview of  
689 the AOM-DSS induced colon cancer model. AOM (10 mg/kg) was injected on day 0. At Day 7,  
690 2% DSS solution was administered to mice in drinking water. Seven days of DSS is followed by  
691 three weeks of drinking water. An additional two cycles of DSS were administered prior to  
692 sacrifice. At Week 15, mice were sacrificed. **b** Colonic tumors in situ. Representative colons  
693 from different groups. Tumors were indicated by red arrows. **c** Tumor numbers in AOM-DSS  
694 induced colon cancer model: VDR<sup>LoxP</sup> and VDR<sup>ΔIEC</sup> mice. Data are expressed as mean ± SD.  
695 n = 25-30, one-way ANOVA test, \*P < 0.05. No tumors in controls for VDR<sup>LoxP</sup> and VDR<sup>ΔIEC</sup> mice,  
696 therefore controls are not included for comparisons. **d** Max tumor size in AOM-DSS induced colon  
697 cancer model: VDR<sup>LoxP</sup> and VDR<sup>ΔIEC</sup> mice. (Data are expressed as mean ± SD. n = 25-30, one-  
698 way ANOVA test, \*P < 0.05. **e** The distance of each tumor to the anus was measured. (Data are  
699 expressed as mean ± SD. n = 25-30, one-way ANOVA test, \*P < 0.05. **f** Representative H&E  
700 staining of “Swiss rolls” of representative colons from the indicated groups. Images are from a  
701 single experiment and are representative of 10 mice per group. **g** Quantitation of PCNA-positive  
702 cells in control mucosa/per intestinal glands or in the tumors tissue/high-power field. PCNA  
703 expression in the tumor tissue of VDR<sup>ΔIEC</sup> mice was significantly higher than that in the VDR<sup>LoxP</sup>  
704 mice. Data are from a single experiment and are representative of 5 mice per group. (Data are  
705 expressed as mean ± SD. n = 5, student’s t-test, \*P < 0.05).

706  
707 **Fig. 2** Dysbiosis leads to high cancer risk in the VDR<sup>ΔIEC</sup> mice. **a** Composition of the bacterial  
708 community at the genus level in stool samples from separate cages of VDR<sup>LoxP</sup> mice(n=10) and  
709 VDR<sup>ΔIEC</sup> (n=10) mice. **b** Unweighted UniFrac distances of stool samples from VDR<sup>LoxP</sup> and  
710 VDR<sup>ΔIEC</sup> mice on a principal coordinate analysis (PCoA) scale. **c** The percentages of the affected  
711 genera were compared between VDR<sup>LoxP</sup> mice and VDR<sup>ΔIEC</sup> mice. (Data are expressed as mean  
712 ± SD. n = 10, Welch’s two-sample t-test, \*P < 0.05). **d** Functional alterations of the intestinal

713 microbiome related to vitamin D receptor (VDR) status. (Data are expressed as mean  $\pm$  SD.  
714 n = 10, student's t-test, \*P < 0.05).

715

716 **Fig. 3** Lacking intestinal VDR leads to dysbiosis and shift of bacterial profile. **a** More *Bacteroides*  
717 *fragilis* in tumor tissue of VDR $\Delta$ IEC mice were found by FISH. Images are from a single experiment  
718 and are representative of 5 mice per group. Scale bars, 40  $\mu$ m. **b** *Bacteroidales fragilis*, *Butyivibrio*  
719 *fibrisolvens* and *Firmicutes peptostreptococcus* were enhanced in tumors in VDR $\Delta$ IEC mice  
720 compared to VDR<sup>LoxP</sup> mice. (Data are expressed as mean  $\pm$  SD. n = 6, one-way ANOVA test,  
721 \*P < 0.05). **c** The fold change ratios of the average concentrations of primary bile acid in the  
722 VDR $\Delta$ IEC group was significantly lower, compared to that in the control group. (VDR<sup>LoxP</sup>, n = 16;  
723 VDR $\Delta$ IEC, n = 17, Welch's two-sample t-test, Metabolite ratio < 1.00, P < 0.05). **d** The fold change  
724 ratios of the average concentrations of secondary bile acid in the VDR $\Delta$ IEC group was significantly  
725 higher, compared to that in the control group. (VDR<sup>LoxP</sup>, n = 16; VDR $\Delta$ IEC, n = 17, Welch's two-  
726 sample t-test, Metabolite ratio  $\geq$  1.00, P < 0.05).

727

728 **Fig. 4** Altered intestinal epithelial and microbial functions may lead to chronic inflammation. **A**  
729 Several lymphocyte markers were detected in colon tissue by immunofluorescence staining.  
730 Levels of CD68, CD3, and CD11b significantly increased in tumors, especially in VDR $\Delta$ IEC mice.  
731 Scale bars, 20  $\mu$ m. **b** Serum samples were collected from VDR<sup>LoxP</sup> and VDR $\Delta$ IEC mice with or  
732 without tumor, then cytokines were detected by Luminex detection system. (Data are expressed  
733 as mean  $\pm$  SD. n = 5-10, one-way ANOVA test, \*P < 0.05). **c** Serum LPS was significantly high in  
734 the VDR $\Delta$ IEC mice. (Data are expressed as mean  $\pm$  SD. n = 6, one-way ANOVA test, \*P < 0.05). **d**  
735 Fecal lipocalin-2 was increased in the VDR $\Delta$ IEC mice with tumors. (Data are expressed as mean  $\pm$   
736 SD. n = 6, one-way ANOVA test, \*P < 0.05)

737

738 **Fig. 5** VDR deletion leads to dysfunction of the Jak2 / Stat3 signaling in the tumor tissue. **a** Jak2  
739 and Stat3 were increased in tumor tissue of VDR<sup>ΔIEC</sup> mice, compared to the tumor tissue of  
740 VDR<sup>LoxP</sup> mice by immunofluorescence staining. Images are from a single experiment and are  
741 representative of 6 mice per group. **b** VDR deletion increased Jak2 and Sat3 in the colon tumor  
742 tissue. (Data are expressed as mean ± SD. n = 3, one-way ANOVA test, \*P < 0.05). **c** VDR  
743 deletion decreased Jak2 and Stat3 at protein levels in colon. (Data are expressed as mean ± SD.  
744 n = 5, student's t-test, \*P < 0.05). **d** VDR deletion decreased Jak2 and Stat3 at mRNA levels in  
745 colon without any treatment. (Data are expressed as mean ± SD. n = 5, Welch's two-sample t-  
746 test, \*P < 0.05). **e** VDRE binds to the Jak2 promoter. CHIP-PCR amplification demonstrated  
747 binding of VDR to the promoter regions of Jak2. PCR were performed including input and negative  
748 controls. n = 3 separate experiments.

749

750 **Fig. 6** Gut microbiota from VDR<sup>ΔIEC</sup> mice activates the JAK/STAT signaling in human and mouse  
751 organoids. **a** Human colonoids were prepared and treated with feces from VDR<sup>lox</sup> or VDR<sup>ΔIEC</sup> mice  
752 for 2 hours. **b** The expressions of Jak2 and Stat3 in human colonoids and **c** mouse colonoids  
753 were detected by western blots. PCNA and beta-catenin were increased in the VDR<sup>ΔIEC</sup> feces  
754 treated group. Data are expressed as mean ± SD. n = 3, one-way ANOVA test, \*P < 0.05,  
755 \*\*P < 0.01, \*\*\*P < 0.001 compare to the control group. **d** Human and **e** mouse organoids were  
756 pretreated with 20 μM of stattic for 2h, then treated with feces for 2 hours. The expression of Jak2  
757 and was increased after static treated, especially in the VDR<sup>ΔIEC</sup> group. The total stat3 were  
758 decreased compare to the no-stattic treated group. Data are expressed as mean ± SD. n = 3,  
759 two-way ANOVA test, \*P < 0.05, \*\*P < 0.01, \*\*\*P < 0.001.

760

761 **Fig. 7** Enhanced bacteria, reduced VDR, increased Jak2 and STAT3 expression was observed  
762 in human CRC patients and AOM-DSS induced colon cancer model. **a** Intestinal VDR expression  
763 was decreased in the AOM-DSS induced colon cancer model. Images are from a single



764 experiment and are representative of 6 mice per group. **b** Intestinal VDR, Jak2 and STAT3  
765 staining in human CRC samples. Compared with normal intestines, CRC patients' intestines had  
766 a statistically significantly lower VDR and higher Jak2/STAT3 expression. Images are  
767 representative of experiments that we carried out in triplicate; Normal, n=10; Colorectal cancer,  
768 n=10. **c** *Bacteroides fragilis* were found in human CRC samples compared to the normal tissue.  
769 Images are representative of experiments that we carried out in triplicate; Normal, n=10;  
770 Colorectal cancer, n=10. **d** A working model of intestinal VDR in regulating microbiome and colon  
771 cancer. Lack of VDR leads to dysbiosis and over-growth of tumors in colon.  
772

# Fig.1

bioRxiv preprint doi: <https://doi.org/10.1101/2020.02.18.946335>; this version posted February 19, 2020. The copyright holder for this preprint (which was not certified by peer review) is the author/funder. All rights reserved. No reuse allowed without permission.

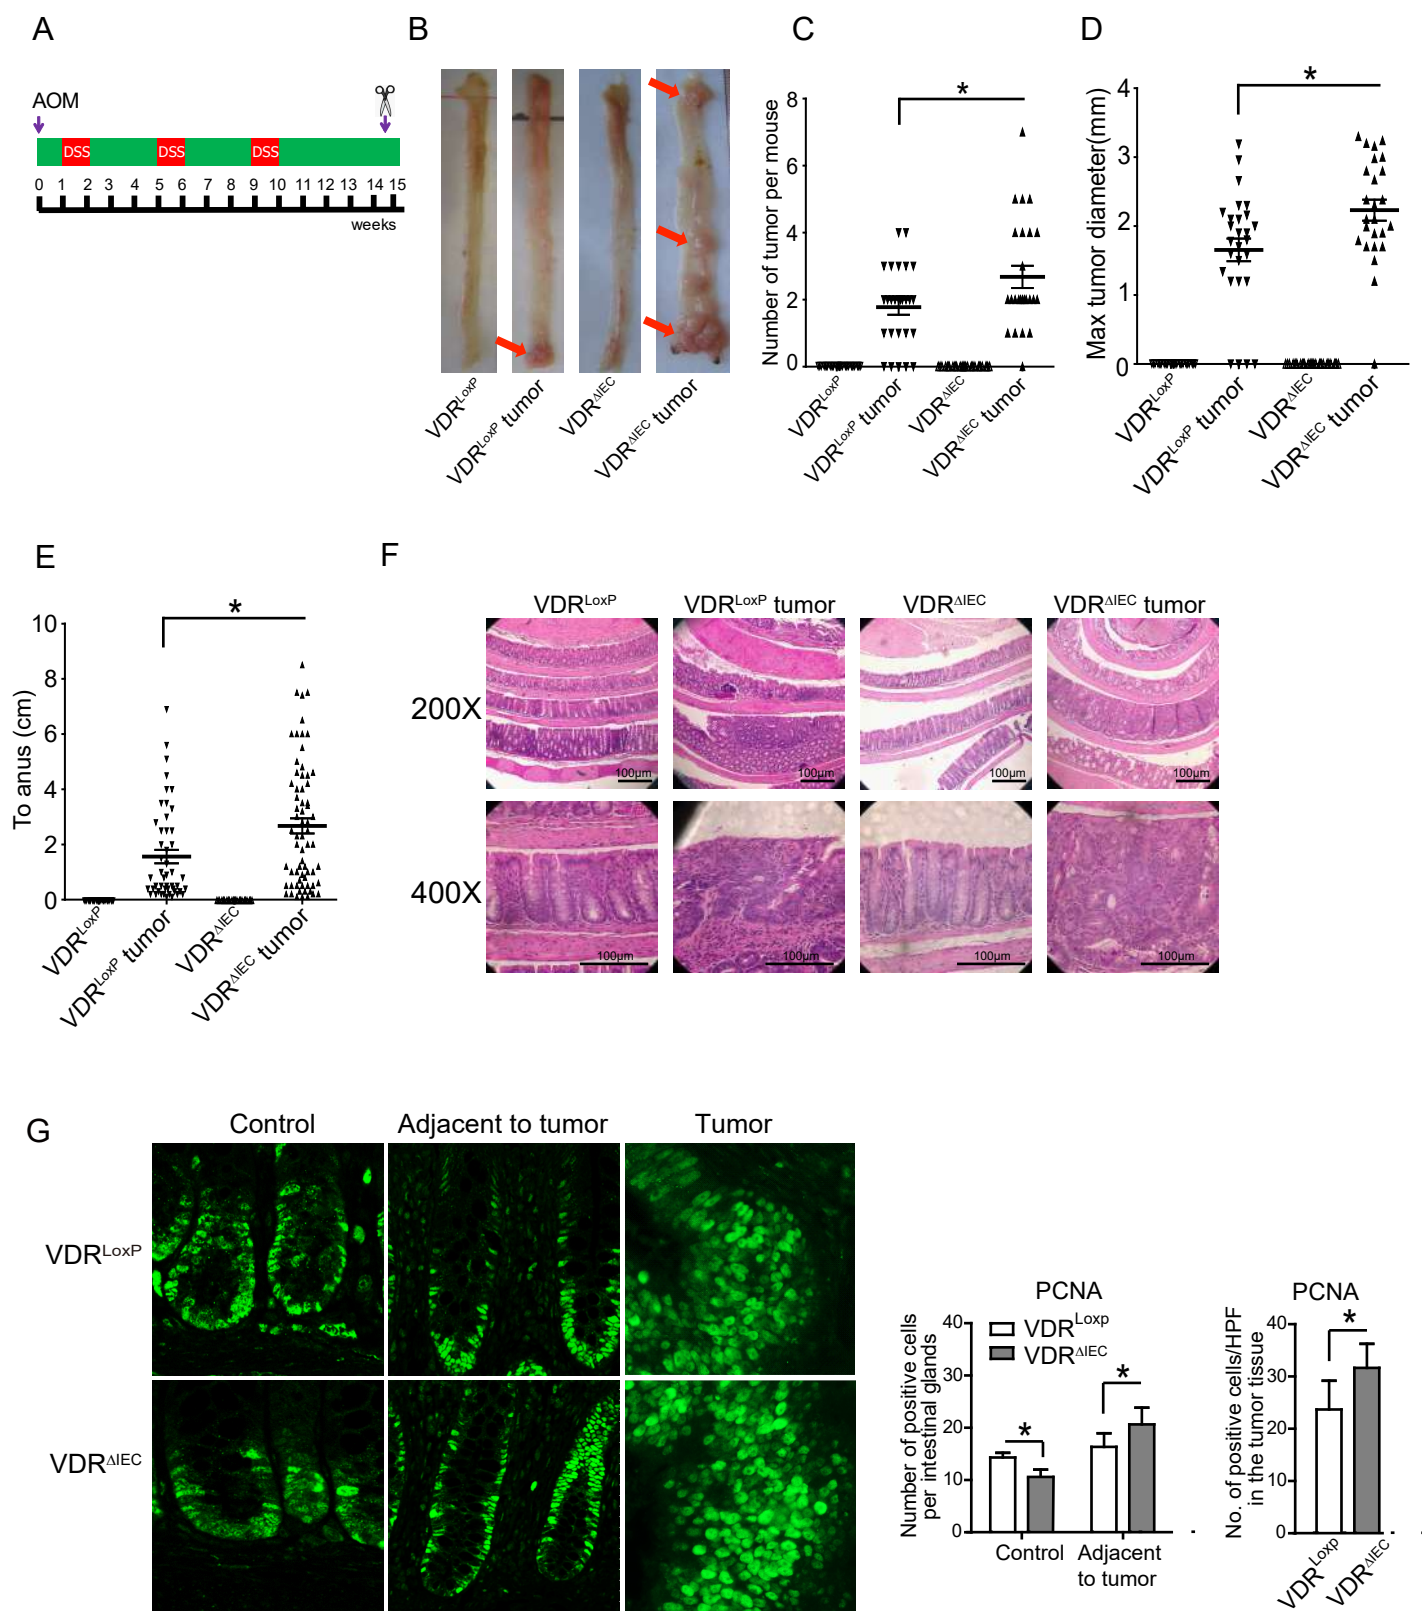

**Fig.2**

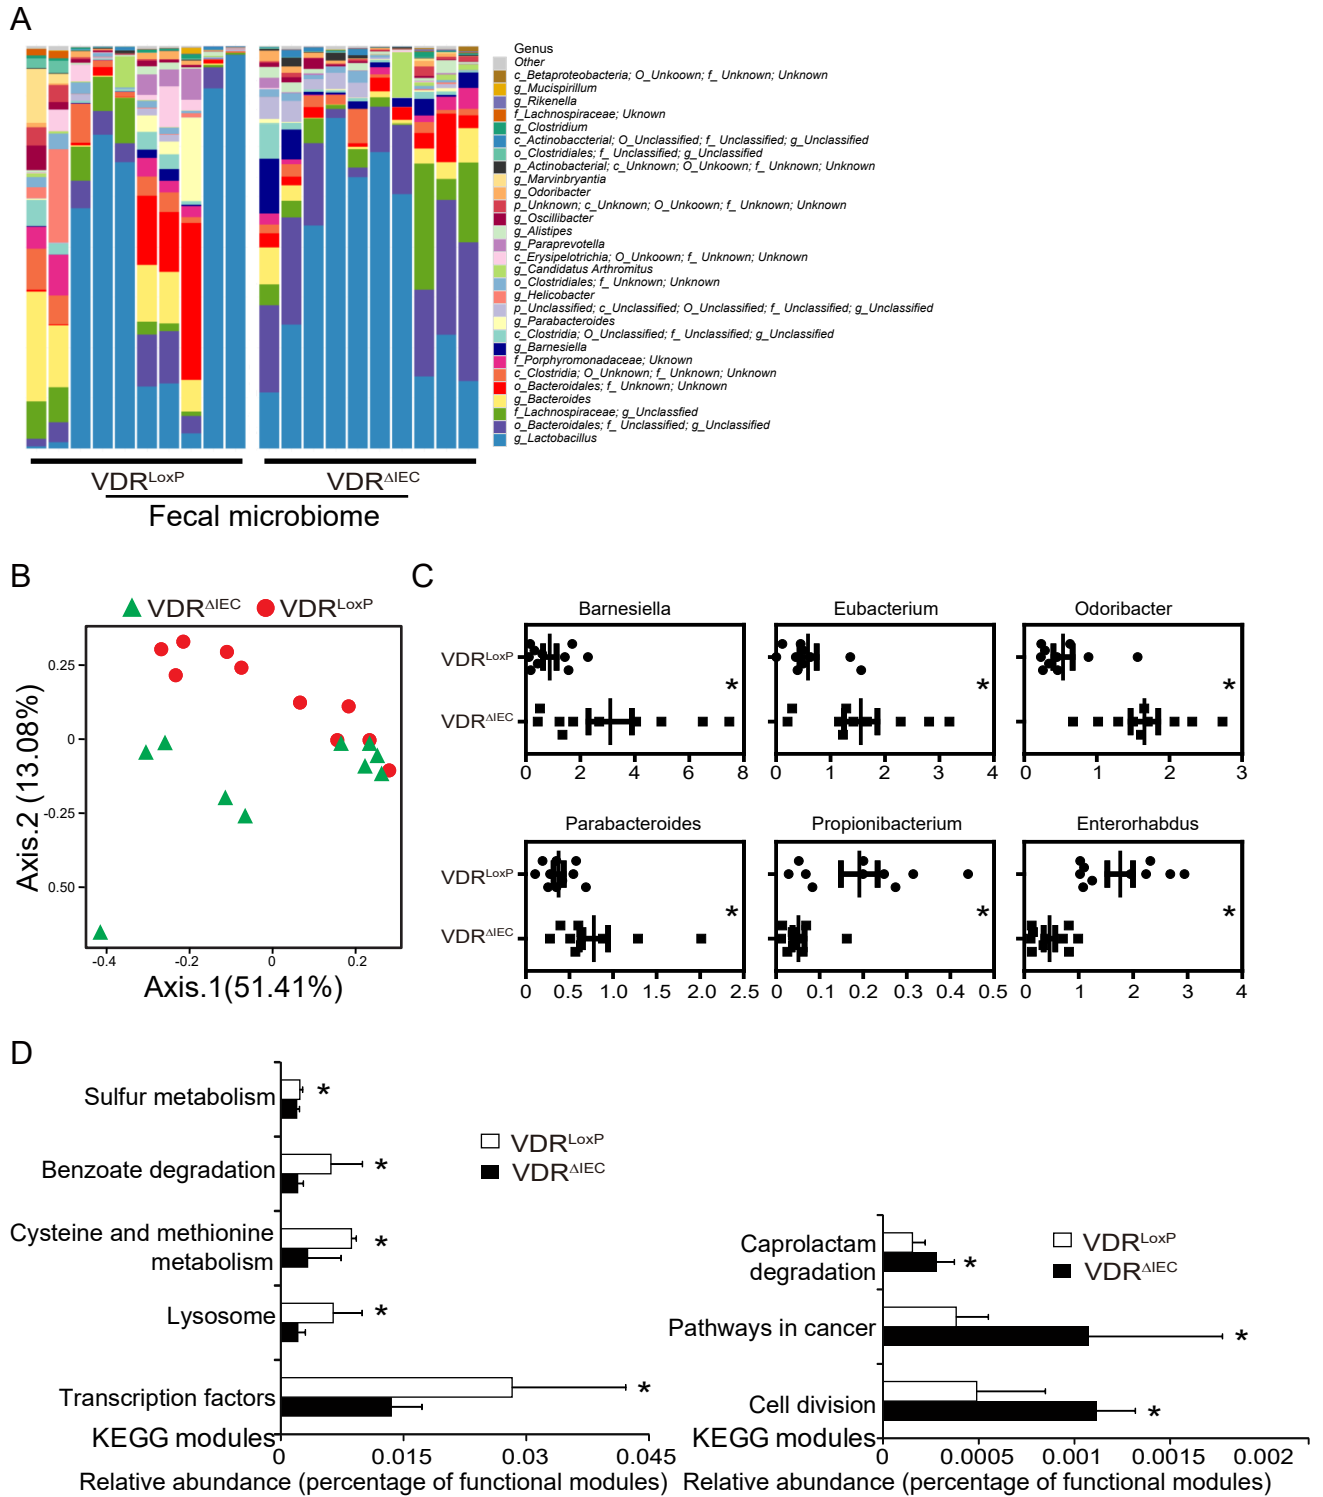

**Fig. 3**

**A tumor** **Tumor<sup>LoxP</sup>** **Tumor<sup>ΔIEC</sup>**  
 bioRxiv preprint doi: <https://doi.org/10.1101/2020.02.18.946335>; this version posted February 19, 2020. The copyright holder for this preprint (which was not certified by peer review) is the author/funder. All rights reserved. No reuse allowed without permission.

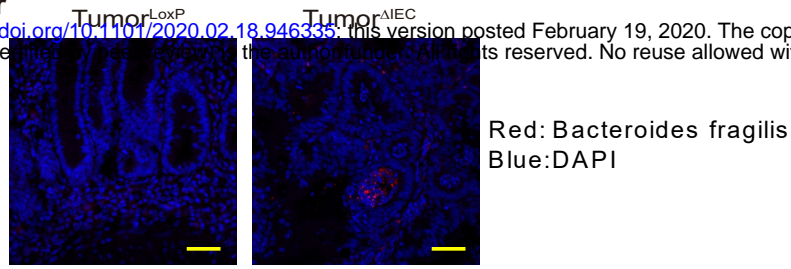**B**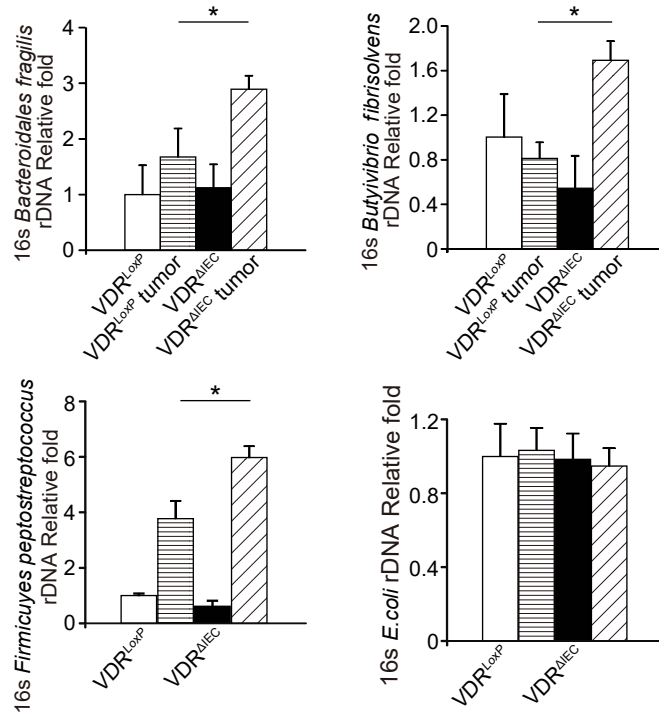**C Primary Bile Acid Metabolism**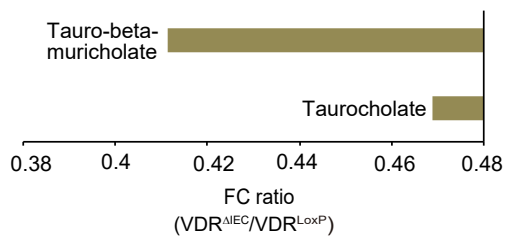**D Secondary Bile Acid Metabolism**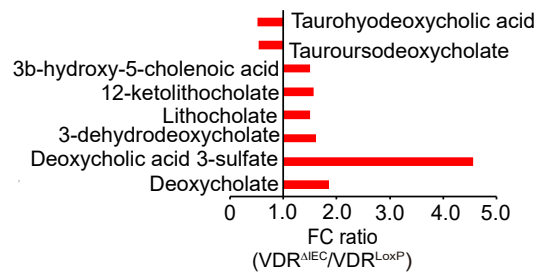

**Fig. 4**

bioRxiv preprint doi: <https://doi.org/10.1101/2020.02.18.946335>; this version posted February 19, 2020. The copyright holder for this preprint (which was not certified by peer review) is the author/funder. All rights reserved. No reuse allowed without permission.

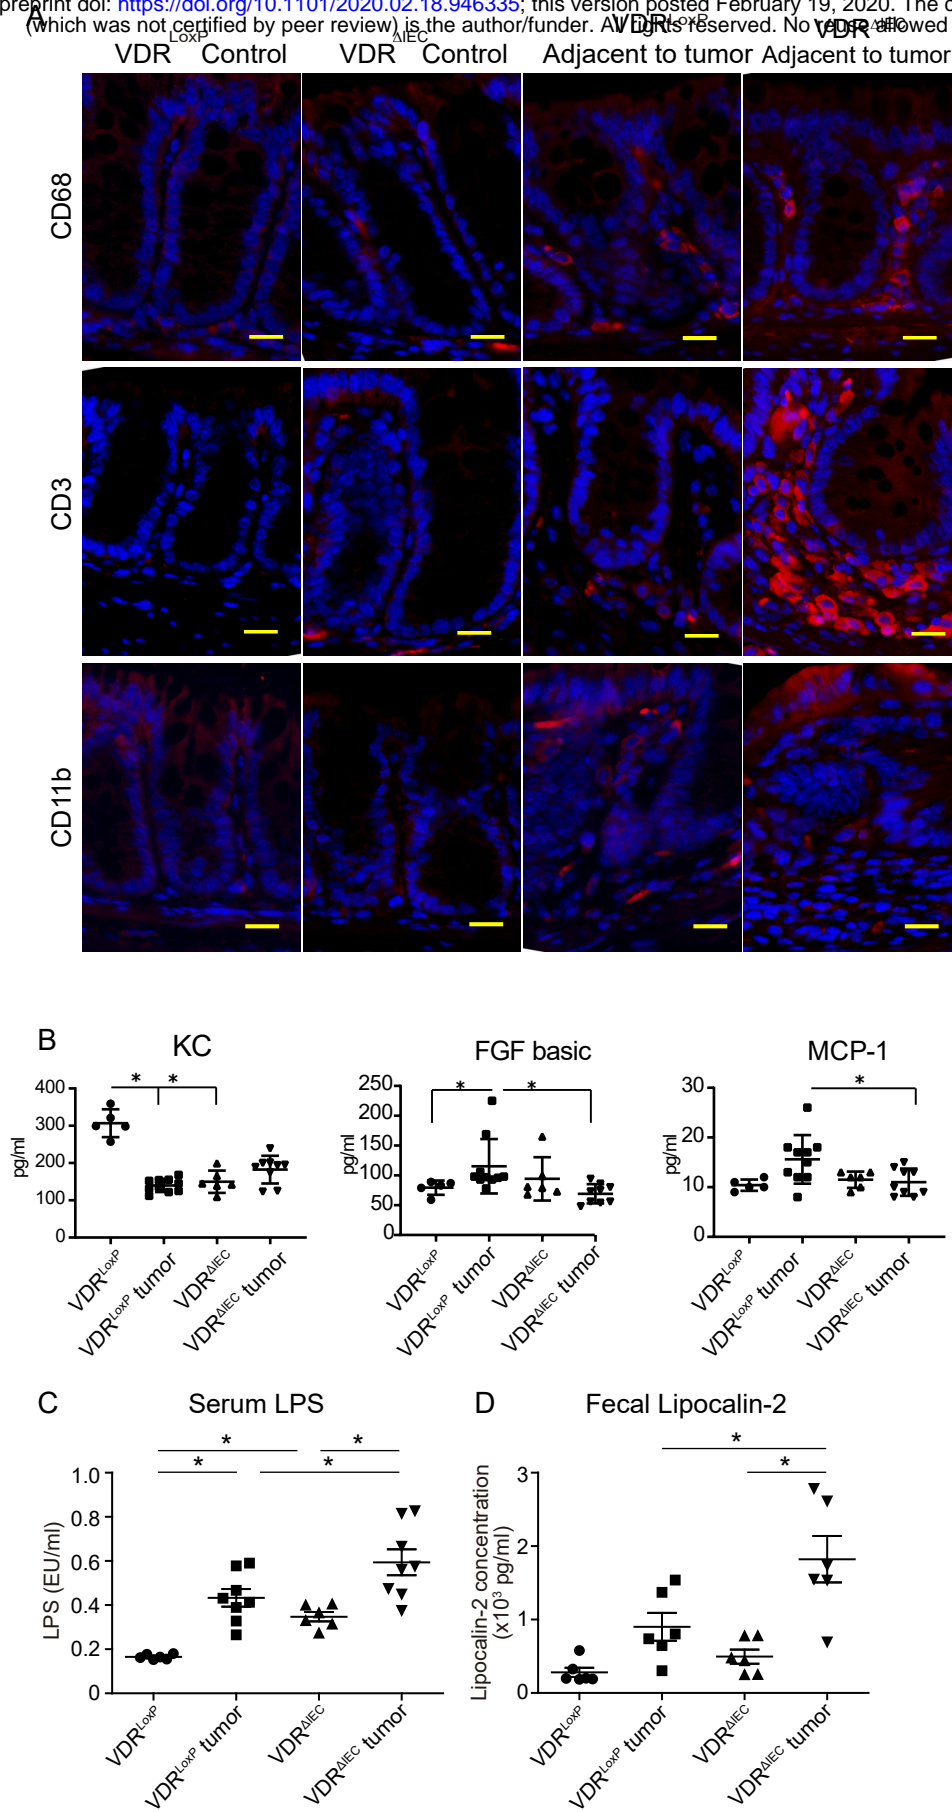

**Fig.5**

bioRxiv preprint doi: <https://doi.org/10.1101/2020.02.18.946335>; this version posted February 19, 2020. The copyright holder for this preprint (which was not certified by peer review) is the author/funder. All rights reserved. No reuse allowed without permission.

**A Jak2**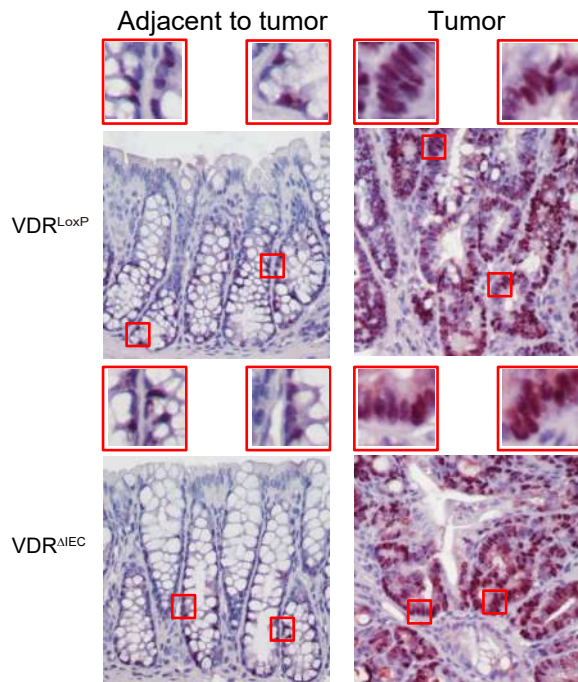**Stat 3**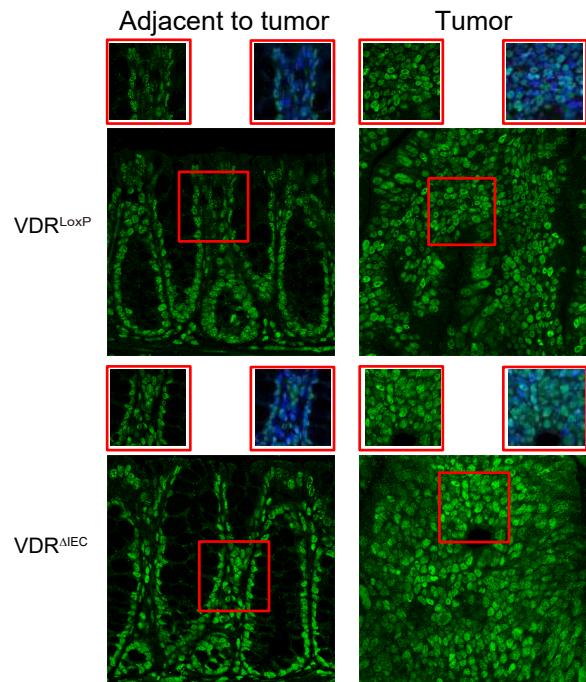**B**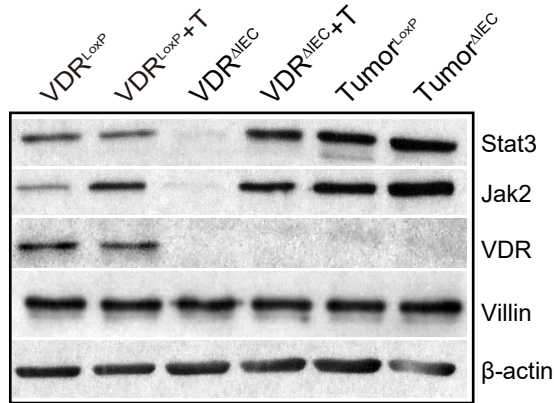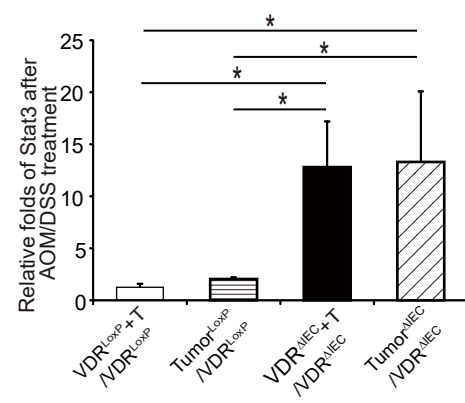**C**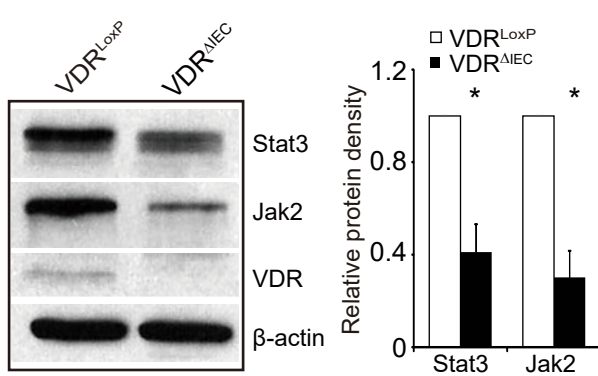**D**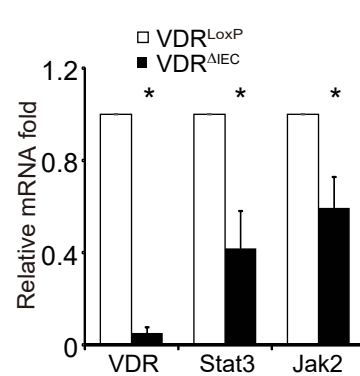**E VDRE in Jak2 promoter**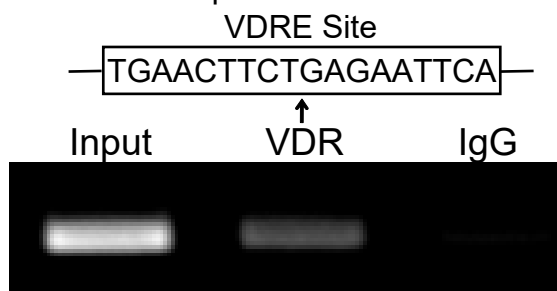

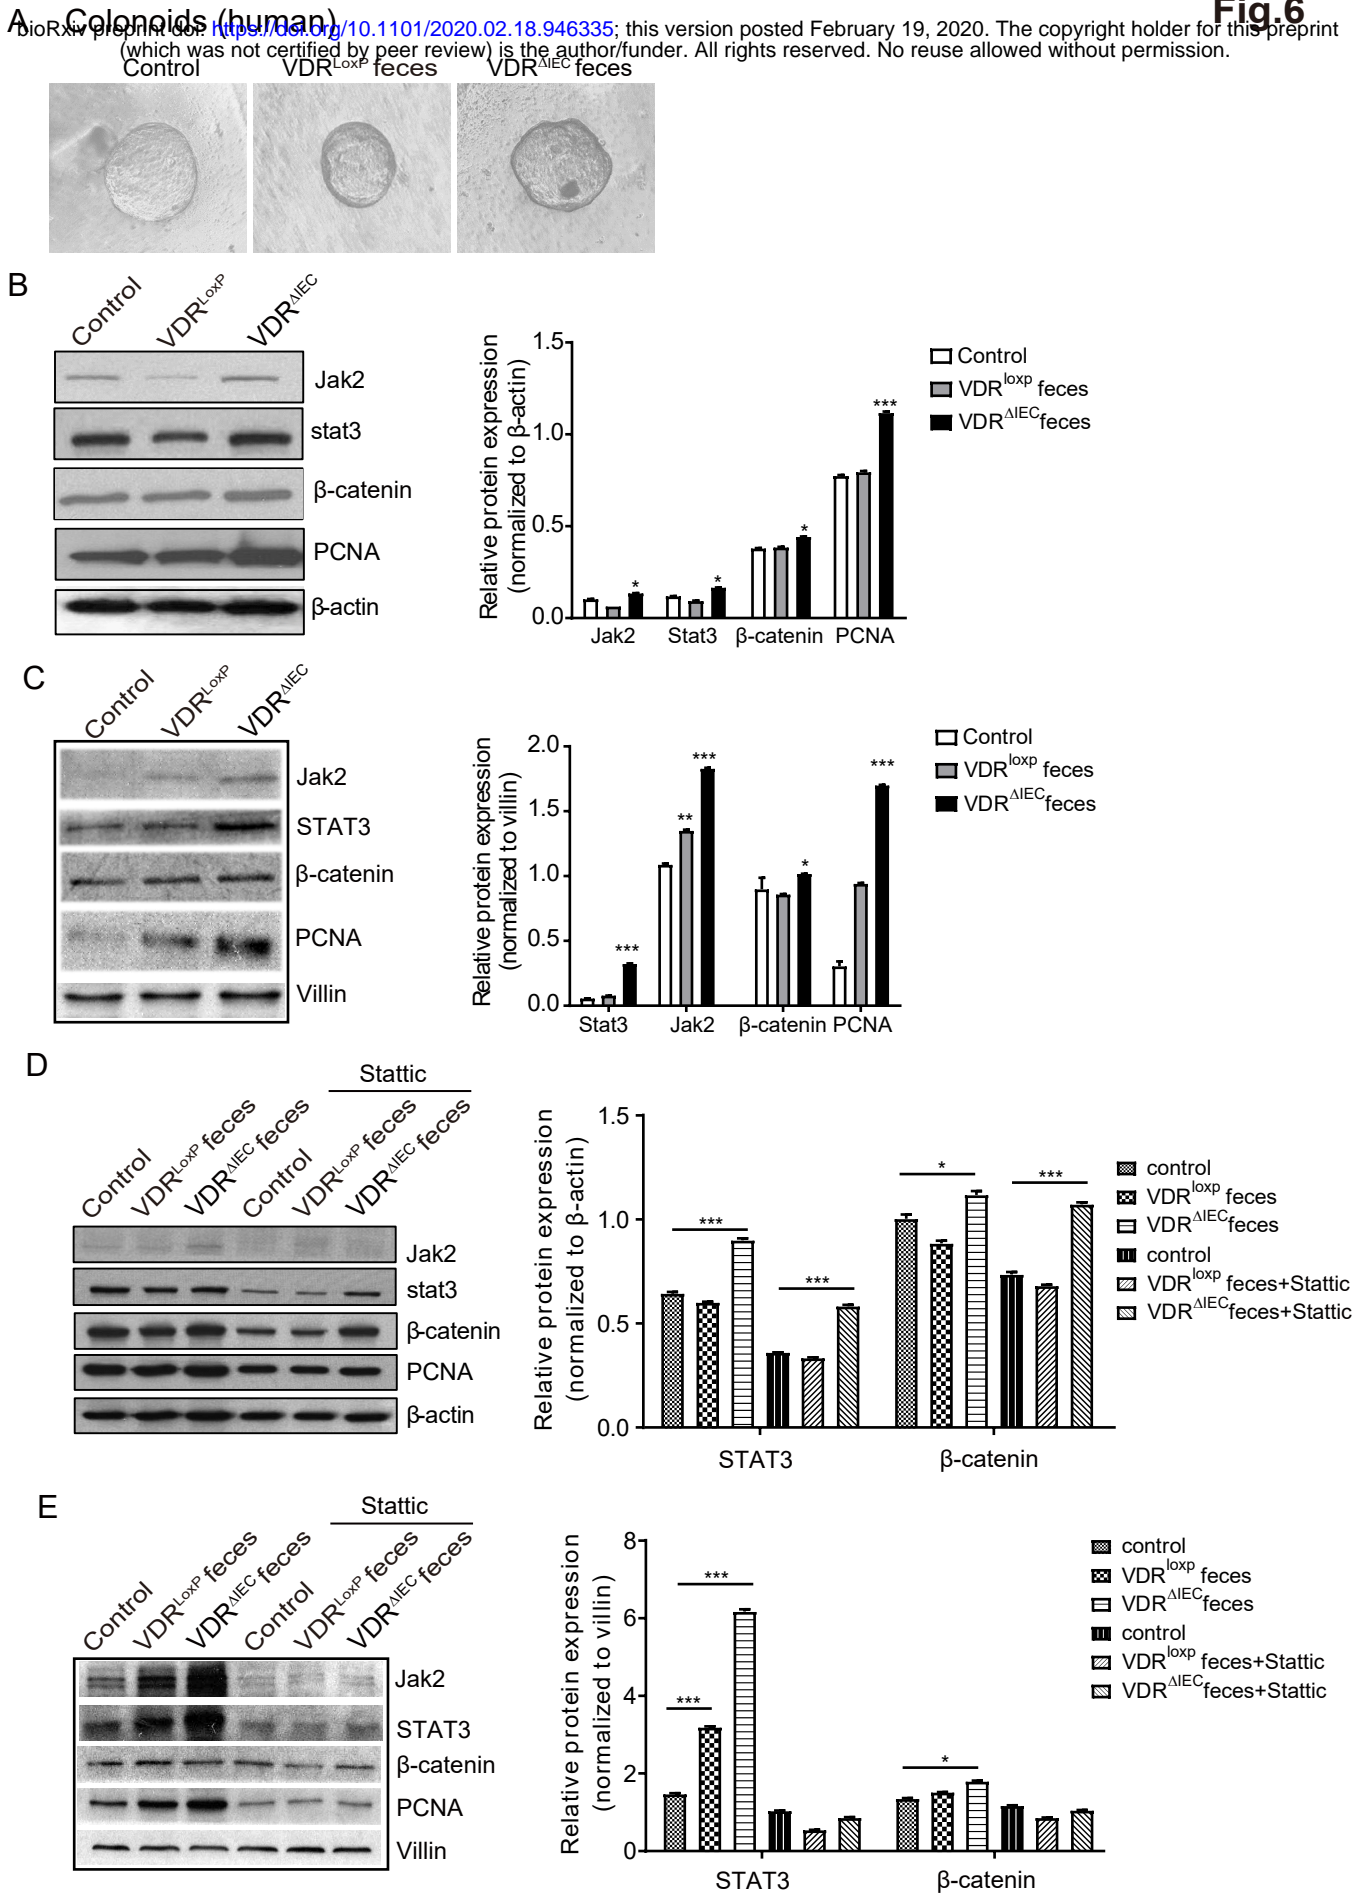

**Fig. 7**

**A Mouse, VDR IHC staining**

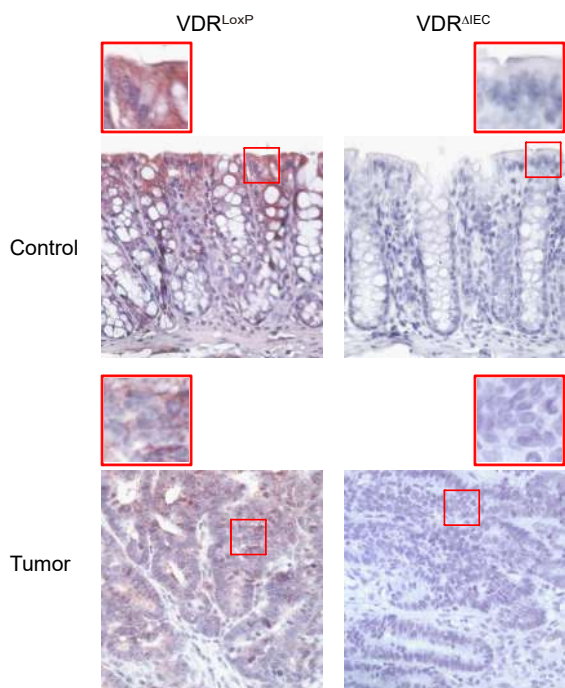

**B Human**

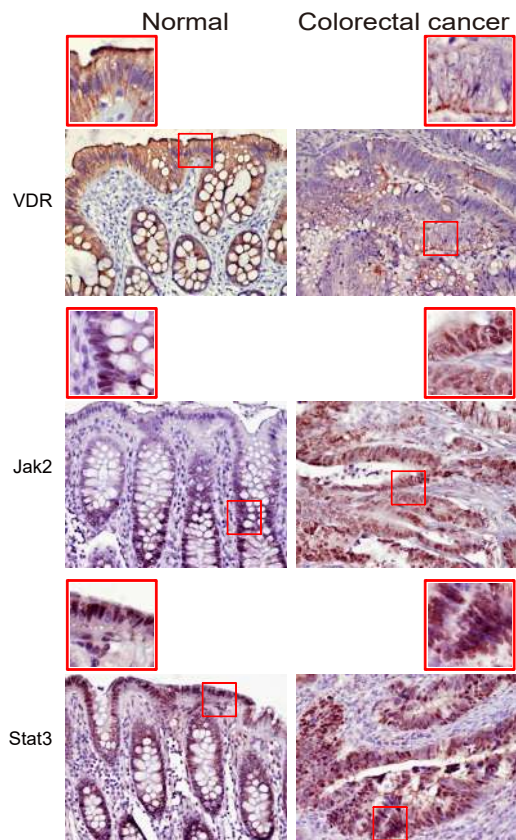

**C Human**

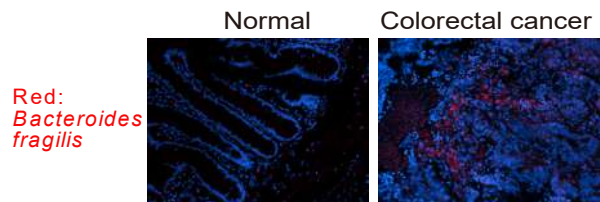

**D**

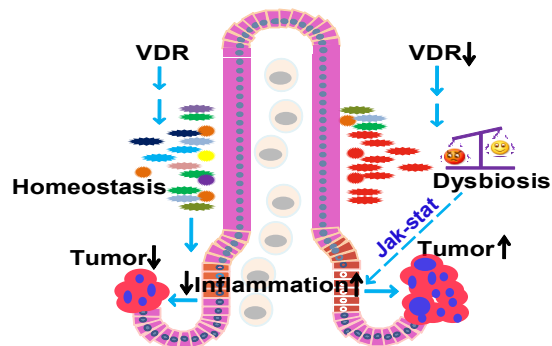



**Sup. Table 1. Real-time PCR primers.**

| <b>Primers name</b> | <b>Sequence</b>                 |
|---------------------|---------------------------------|
| hJAK2F              | 5'- TCTGGGGAGTATGTTGCAGAA -3'   |
| hJAK2R              | 5'- AGACATGGTTGGGTGGATACC -3'   |
| hActinF             | 5'- AGAGCAAGAGAGGCATCCTC -3'    |
| hActinR             | 5'- CTCAAACATGATCTGGGTCA -3'    |
| mJAK2F              | 5'- AGACTTCCAGAACCAGAACAAAG -3' |
| mJAK2R              | 5'- TCACAGTTTCTTCTGCCTAGCTA -3' |
| mStat3F             | 5'- CAGCAGCTTGACACACGGTA -3'    |
| mStat3R             | 5'- AAACACCAAAGTGGCATGTGA -3'   |
| mActinF             | 5'- GTGACGTTGACATCCGTAAAGA -3'  |
| mActinR             | 5'- GCCGGACTCATCGTACTCC -3'     |

**Sup. Table 2. Bacterial 16S rDNA Real-time PCR primers.**

| <b>Primers name</b>                        | <b>Sequence</b>                    |
|--------------------------------------------|------------------------------------|
| <i>Bacteroidales fragilis</i> 16s F        | 5'- GGCGCACGGGTGAGTAACA -3'        |
| <i>Bacteroidales fragilis</i> 16s R        | 5'- CAATATTCCTCACTGCTGC -3'        |
| <i>Butyivibrio Fibrisolvens</i> 16s F      | 5'- CTAACACATGCAAGTCGAACG -3'      |
| <i>Butyivibrio Fibrisolvens</i> 16s R      | 5'- CCGTGTCTCAGTCCCAATG -3'        |
| <i>Firmicuyes Peptostreptococcus</i> 16s F | 5'- CATTGGGACTGAGACAC -3'          |
| <i>Firmicuyes Peptostreptococcus</i> 16s R | 5'- AATCCGGATAACGCTTGC -3'         |
| <i>E.Coli</i> 16s F                        | 5'- CCTACGGGAGGCAGCAGT -3'         |
| <i>E.Coli</i> 16s R                        | 5'- CGTTTACGGCGTGGACTAC -3'        |
| Univ bacteria 16s F                        | 5'- TCCTACGGGAGGCAGCAGT -3'        |
| Univ bacteria 16s R                        | 5'- GGACTACCAGGGTATCTAATCCTGTT -3' |
